---

1 **CsHscB as a novel TLR2 agonist from carcinogenic liver**  
2 **fluke *Clonorchis sinensis* modulates host immune response**

3  
4 **Chao Yan<sup>1,†</sup>, Fang Fan<sup>1,†</sup>, Yu-Zhao Zhang<sup>1, †</sup>, Jing Wu<sup>1</sup>, Xin Dong<sup>1</sup>,**  
5 **Hai-Liang Liu<sup>2</sup>, Chun-Yang Fan<sup>3</sup>, Qian Yu<sup>1</sup>, Liang Wang<sup>4</sup>, Xiang-Yang Li<sup>1</sup>,**  
6 **Yu-Gang Wang<sup>1</sup>, Jia-Xu Chen<sup>5</sup>, Ren-Xian Tang<sup>1</sup>, Kui-Yang Zheng<sup>1,3\*</sup>**

7 1 Jiangsu Key Laboratory of Immunity and Metabolism, Department of Pathogenic Biology  
8 and Immunology, Laboratory of Infection and Immunity, Xuzhou Medical University, P. R.  
9 China

10 2 CapitalBio Technology Inc., Beijing 101111, P.R China

11 3 National Experimental Demonstration Center for Basic Medicine Education, Department of  
12 Clinical Medicine, Xuzhou Medical University

13 4 College of Bioinformatics, Xuzhou Medical University, P. R. China

14 5 National Institute of Parasitic Diseases, Chinese Center for Disease Control and Prevention,  
15 Key Laboratory of Parasite and Vector Biology, Ministry of Health, WHO Collaborating  
16 Center of Malaria, Schistosomiasis and Filariasis, Shanghai, 200025, People's Republic of  
17 China.

18 **Running title: CsHscB- a TLR2 agonist from *Clonorchis sinensis***

19 †These authors contributed equally to the work

20 \* Correspondence:

21 Corresponding author: E-mail: [zky@xzhmu.edu.cn](mailto:zky@xzhmu.edu.cn)

22

23 **Abstract**

24 *Clonorchis sinensis*-a fluke dwelling on the intrahepatic bile ducts causes  
25 clonorchiasis. During *C. sinensis* infection, worm-host interaction results in activation  
26 of PRRs and further triggers immune responses which determine the outcome of  
27 infection. However, the mechanisms by which pathogen-associated molecules  
28 patterns from *C. sinensis* interacted with TLRs were poorly understood. In the present  
29 study, we identified a ~34 kDa lipoprotein CsHscB from *C. sinensis* which physically  
30 bound with TLR2. We also found that recombinant CsHscB (rCsHscB) potently  
31 activated macrophage to express various proteins including TLR2, CD80, MHCII,  
32 and cytokines like IL-6, TNF- $\alpha$ , and IL-10 in a TLR2-dependent manner but rCsHscB  
33 failed to induce IL-10 in macrophages from *Tlr2*<sup>-/-</sup> mice. Moreover, ERK1/2  
34 activation was required for rCsHscB-induced IL-10 production in macrophages. In  
35 vivo study revealed that rCsHscB triggered a high induction of IL-10 in the wild-type  
36 (WT) but not in *Tlr2*<sup>-/-</sup> mice. Our data thus demonstrate that rCsHscB from *C. sinensis*  
37 is an unidentified TLR2 agonist with immune regulatory activities, and may have  
38 some therapeutic implications in future beyond parasitology.

39 **Keywords:** CsHscB, TLR2, *Clonorchis sinensis*, host-parasite interaction, agonist,  
40 MAPK

41

42

43

44

45

## 46 **Introduction**

47

48 During helminth infection, the complex host-parasite interaction triggers host immune  
49 responses which ultimately drive the resistance to infection or immune evades  
50 accompanying with the course of immunopathogenesis. For this view, type 2 immune  
51 responses including IL-4, IL-9, IL-5 and IL-13 secreted by ILC2, Th2 or alternatively  
52 activated macrophage (AAM or M2) are typically considered as protective immunity  
53 against helminths to results in parasite expulsion ultimately [1]. However, the  
54 regulatory cells (Treg, Breg, ILCreg, M2c etc) can produce the regulatory cytokines  
55 (IL-10, etc) to ameliorate the bias of type II immune responses, which appears to be  
56 mainly responsible for the worms survival with the limited immunological damages  
57 and further establishment of chronic infection [2]. Further studies have demonstrated  
58 that MAPK (such as ERK, p38) and NF- $\kappa$ B signaling (NF- $\kappa$ B p50 homodimers)  
59 contribute to the mechanisms that control the production of IL-10 [3, 4]. However, the  
60 mechanisms by which the complex immune responses are initiated and  
61 finely-orchestrated remains poorly elucidated.

62 Toll-like receptors represent one of most important pattern recognition receptors  
63 (PRRs) that sense the conserved pathogen products (also called pathogen-associated  
64 molecular pattern, PAMP) from worms or alarming (also called dangers-associated  
65 molecular pattern, DAMP) sourced from damage tissues in the early event of  
66 infection. For example, TLR2 collaborated with TLR1 or TLR6 recognize triacylated

67 or diacylated lipoproteins, respectively and thereby activate signal transduction  
68 cascades to result in the expression of pro-inflammatory or anti-inflammatory  
69 mediator genes [5-7]. So far several TLR2 ligands from *S. mansoni*,  
70 *Wolbachia*-endosymbiotic bacteria of *Brugia malayi* have been identified and  
71 demonstrated as potent immune regulators to determine the polarization of immune  
72 and even the outcome of helminth infection. For example, lysophosphatidylserine  
73 (Lyso-PS) from *S. mansoni* bound with TLR2 on dendritic cells allows DC to train  
74 IL-10 producing Tregs, which enables the long term survival of the parasite, as well as  
75 ameliorates of immunopathogenesis due to polarized type 2 immune responses [8].  
76 Diacyl WoLP sourced from *Wolbachia* induces dendritic cell maturation and  
77 activation as well as drives CD4 T cell polarization and antibody switching in a  
78 TLR2-dependent manner [9].

79 Clonorchiasis caused by *Clonorchis sinensis* remains a major parasitic disease in  
80 eastern Asia such as China, Korea, Vietnam and eastern Russia [10]. There are  
81 approximately 15 million people infected worldwide whereas 12.5 million people are  
82 distributed in China, posing a severe public health issue in these regions. The adult  
83 worms dwelling on the intrahepatic bile duct cause cholelithiasis, cholangitis,  
84 cholecystitis, biliary fibrosis and even cirrhosis due to its long-term survival.  
85 Additionally, chronic infection with this fluke has been shown to cause  
86 cholangiocarcinoma (CCA) and *C. sinensis* is now defined as Group 1 human  
87 biological agents (carcinogens) by International Agency of Research on Cancer  
88 (IARC) due to sufficient pieces of evidence in human [11, 12]. Previous studies have

89 shown that the components of *C. sinensis* excretory/secretory products (ESPs) and  
90 crude antigen (CA) can potently induce a type 2 or a mix type1/type2 immune  
91 responses *in vitro* [13-15]. *In vivo* study, during *C. sinensis* infection, the interaction  
92 between worms and host immune cells also potently drives type I immune responses  
93 with type 2 becoming more prevalent after worms are well-developed in susceptible  
94 hosts [16]. Furthermore, our previous study also showed that the expression of TLR2  
95 is dramatically changed with the prolonged infection, which suggested that TLR2  
96 might be involved in this dramatically immunological changing [17]. However, the  
97 mechanisms that account for this phenotypic shifting is poorly understood so far. In  
98 view of this background, the objectives of the present study were to identify the  
99 molecules from *C. sinensis* that are responsible for activation of TLR2 and investigate  
100 its possible effects on the activation on macrophage. In our present study, we  
101 identified a lipoprotein-rCsHscB interacted with TLR2 acting as an unidentified  
102 TLR2 agonist induce the activation of macrophage secreting high levels of  
103 pro-inflammatory and anti-inflammatory cytokines in a TLR2-dependent manner. Our  
104 present study will contribute to a better understanding of the interaction between the  
105 *C. sinensis* and host cells. In addition, in view of regulatory immune capacities of  
106 rCsHscB, our study also provides an alternative therapeutic approach for implications  
107 beyond parasitology.

108

## 109 **Materials and Methods**

110

111 **Ethics**

112 Animal care and all experimental perform in this study were conformed to the  
113 guidelines of the National Laboratory Animal Center. The main procedures and  
114 protocol were reviewed and approved by the Animal Care and Use Committee of  
115 Xuzhou Medical University License (2016-SK-03).

116

117 **Mice**

118 Male C57BL/6 mice (specific pathogen-free, SPF) aged 8 weeks (20-22g) were  
119 purchased from the Beijing Vital River Laboratory Animal Technology Co. Ltd. The  
120 mice were group-housed in a specific pathogen-free condition with  
121 temperature-control room (25 °C). All mice were given standard chow diet and tap  
122 water *ad libitum*.

123 To obtain *C. sinensis*-positive sera, BALB/c mice were orally infected by 45  
124 nangyou and the mice were sacrificed on 28 days and 56 day post-infection (p.i.), the  
125 sera from *C. sinensis*-infected mice and no-infected mice were collected for further  
126 use.

127 Mice were immunized with around 10 µg of *C. sinensis* crude antigen in IFA. Two  
128 booster doses in IFA were injected in 15 days interval. Titers of antibody against to *C.*  
129 *sinensis* crude antigen were determined by ELISA.

130

131 **Preparation of rCsHscB and control protein**

132 rCsHscB and control protein (only His-tagged protein encoded by pET-28a vector

133 without CsHscB open reading frame) were routinely expressed by *E. coli* (Ec).  
134 rCsHscB was purified by nickel-affinity and ion-exchange chromatography. For more  
135 details, see the Supplementary Material.

136

#### 137 **Development of specific rCsHscB polyclonal antibody**

138 The Ab to the rCsHscB protein was generated in rabbits that were maintained in the  
139 animal house facility of Xuzhou Medical University. In brief, rabbits were immunized  
140 with around 10 µg of rCsHscB in IFA. Two booster doses in IFA were injected in 15  
141 days interval. After measuring the rCsHscB-specific Ab titer by ELISA, animals were  
142 sacrificed at day 45 to collect and separate sera. The poly-antibody against rCsHscB  
143 was purified by metal affinity chromatography. In an immunoblot, the Ab raised  
144 against the rCsHscB protein specifically recognized single band of ~36 kDa.

145

#### 146 **Immunohistochemistry**

147 rCsHscB was stained on paraffin-embedded adult worm *C. sinensis* by  
148 immunohistochemistry using the affinity-purified anti-rCsHscB antibody. Reactivity  
149 was detected using Dako REAL™ EnVision™ Detection System ((Dako, Glostrup,  
150 Denmark). Sections were counterstained with hematoxylin and photographed by a  
151 microscope.

152

#### 153 **Cell culture and stimulation**

154 Mouse mononuclear macrophage leukemia cells RAW264.7 with 5~10 passages were

155 cultured in DMEM (Hyclone, US) containing 10% fetal bovine serum (FBS) (Serana,  
156 AUS), 1% penicillin/streptomycin (Beyotime, China) in a humidified atmosphere with  
157 5% CO<sub>2</sub> at 37°C. RAW264.7 cells were stimulated by rCsHscB (5~20 µg/ml) for 6 h,  
158 12 h and 24 h. Supernatants were collected for assessing the concentrations of  
159 cytokines using ELISA. For TLR2 blocking assay, RAW 264.7 cells were pretreated  
160 with MAb-mTLR2 (2 µg/ml) or isotype (Invivogen, US) for 2 h. The cells were then  
161 stimulated by rCsHscB (20 µg/ml) or Pam<sub>3</sub>CSK<sub>4</sub> (200 ng/ml) (Invivogen, US) for 24  
162 h in a humidified atmosphere with 5% CO<sub>2</sub> at 37 °C. The supernatants and cultured  
163 cells were collected for flow cytometry assays for ELISA, respectively.

164 Bone marrow cells were obtained from the long bones of 8- to 10-week-old C57BL/6  
165 mice (WT or *Tlr2*<sup>-/-</sup>). Bone marrow cells were cultured in the presence of M-CSF (20  
166 ng/mL) (PeproTech, USA) for six days to generate the bone marrow-derived  
167 macrophages (BMDMs). BMDMs were cultured in DMEM (Hyclone, US) containing  
168 10% fetal bovine serum (FBS) (Serana, AUS), 1% penicillin/streptomycin (Beyotime,  
169 China) in a humidified atmosphere with 5% CO<sub>2</sub> at 37°C. Thereafter, BMDMs were  
170 stimulated by rCsHscB (5~40 µg/ml) or production of *E. coli* transfected by pET-28  
171 control vectors for 24h and supernatants were obtained for determining the  
172 concentration of IL-10 using ELISA. For ERK1/2 inhibitor assay, PD98059 (1 µM)  
173 (Sigama, US) was pre-incubated with cells for 2 h, BMDMs from WT or *Tlr2*<sup>-/-</sup> mice  
174 were stimulated by rCsHscB (20 µg/ml) or Pam<sub>3</sub>CSK<sub>4</sub> (200 ng/ml) (Invivogen, US)  
175 and supernatants were used for ELISA.

176



177 **Western blotting analysis**

178 Total cell lysates or rCsHscB were separated by 10% SDS-polyacrylamide gel  
179 electrophoresis (PAGE) and transferred onto Immobilon-P Transfer Membranes  
180 (PVDF) (Millipore, USA). For detection specific antibodies against to rCsHscB in  
181 vivo, sera from *C. sinensis*-infected and non-infected mice, as well as *C. sinensis*  
182 crude antigens immunizing sera as primary antibodies for 12 h at 4°C, and then  
183 horseradish peroxidase-conjugated secondary antibody (Beyotime, China) were  
184 incubated. For detection of MAPK signaling, the PVDFs were blocked with 5%  
185 non-fat-milk in PBS-Tween (PBS-T) and incubated with anti-His (ZSGB-Bio, China),  
186 anti-phospho ERK (CST, US), anti-phospho p38 (CST, US), anti-TLR2 (CST, US),  
187 anti- $\beta$ -actin (Beyotime, China), and horseradish peroxidase-conjugated secondary  
188 antibody (Beyotime, China). The PVDFs were visualized by ECL exposure to X-ray  
189 film. Densitometry analyses were performed by Image Lab software.

190

191 **Flow cytometry**

192 Following stimulation, RAW264.7 were stained with TLR2 (eFlour 660), CD80 (PE),  
193 CD86 (eFlour 450), major histocompatibility complex class II (FITC), CD206  
194 (PE/Cy7), CD11b (APC-Cy7). BMDMs were stained with TLR2 (eFlour 660), CD11b  
195 (APC-Cy7), F4/80 (Percp-Cy5.5). Antibodies were purchased from BD Pharmigen  
196 (US). Samples were analyzed with FlowJo software.

197

198 **ELISA**

199 Supernatants from RAW264.7 or BMMs cultures were analyzed using commercially  
200 available ELISA kits for IL-10, IL- 6 and TNF- $\alpha$  (all from eBioscience, San Diego,  
201 CA, US).

202

### 203 **Pull-down assay**

204 The cells were stimulated by supernatant of lysate from *E. Coli* transfecting with  
205 Vector controls (pET-28, His-tagged control), pET-28a-CsHscB vectors  
206 (pET-28-CsHscB, unpurified), purified rCsHscB-stimulated cells, binding buffer  
207 and medium for 24 h, subsequently, the cells from each group were lysed for further  
208 use. The rCsHscB were incubated with Ni-NTA beads (QIAGEN, GER) for 12h at 4°C  
209 after the agaroses were balanced with binding buffer at 4 times in 4°C. rCsHscB  
210 immobilized on bead were incubated with total cell lysates (RAW264.7) for 12h at  
211 4°C. The supernatant was discarded after centrifuged at 2500 rpm for 5 minutes in  
212 4°C. The bead-bound proteins were subjected to 10% SDS-PAGE and then transferred  
213 electrophoretically to PVDF membranes. The membranes were incubated with  
214 anti-His antibody or anti-TLR2 antibody, followed by horseradish  
215 peroxidase-conjugated secondary antibody (Beyotime, China). The PVDFs were  
216 visualized by ECL exposure to X-ray film.

217

### 218 **Statistical analysis**

219 All data were expressed as the mean  $\pm$  standard error of the means (SEM). One-way  
220 ANOVA was used to analyze the significance of the differences between groups,

221 followed by Tukey's test using SPSS 13.0. For all tests,  $P < 0.05$  was considered  
222 statistically significant.

223

## 224 **Results and discussion**

225

### 226 **Identification, characterization and immunogenicity of recombinant *C. sinensis***

#### 227 **HscB**

228 As most TLR2 agonists or ligands have been reported as lipoproteins or lipopeptides  
229 [18], to identify potential agonist of TLR2 sourced from *C. sinensis*, we collected all  
230 the amino acid sequences encoding *C. sinensis* proteins from the proteome data  
231 (<http://www.ncbi.nlm.nih.gov/bioproject/PRJDA72781>) and then putative lipoproteins  
232 from *C. sinensis* proteome were screened and predicted using a combination of  
233 DOLOP, lipoP and Lipo database as previously described [9]. We ultimately identified  
234 a lipoprotein named molecular chaperone HscB (CsHscB), which had 283 amino  
235 acids with three domains as followed: DnaJ, Co-chaperone HscB (COHscB) and  
236 C-terminal oligomerization (CTO) (Fig. 1A). Alignment of amino acid sequences  
237 analysis showed that the sequences of *C. sinensis* HscB had more than 90%  
238 similarities to *Opisthorchis viverrini* hypothetical protein (XP\_009168973.1), but only  
239 had 40.91% similarities to the putative co-chaperone protein HscB from *Schistosoma*  
240 *mansoni* and 33.64% to the co-chaperone HscB from *Echinococcus granulosus* (Fig.  
241 1B). The candidate lipoproteins were further selected for prediction of N-terminal  
242 signal peptide using SignalP server 3.0 (<http://www.cbs.dtu.dk/services/SignalP-3.0/>)

243 by a hidden Markov model (HMM) [19]. CsHscB had a signal peptide (the probability  
244 was 0.759, Fig. 1C) and the predicted cleavage sites was at between N-terminal 34  
245 and 35 sites (Fig.1C).

246 However, it was very difficult to isolate and purify CsHscB directly from the worms  
247 due to lack of the sufficient background information as well as the low yield. We  
248 therefore used a recombinant CsHscB (rCsHscB) that was routinely expressed by *E.*  
249 *coli* (Ec). rCsHscB was purified by nickel-affinity and ion-exchange chromatography,  
250 and the purified rCsHscB was assessed by western-blot (Fig 1D). The molecular  
251 weight of rCsHscB including a 6×his tag was approximate 36 kDa (Fig 1D).  
252 Furthermore, we prepared the specific rCsHscB antibody to examine the expression  
253 and distribution of CsHscB in worm body using immunohistochemistry (IHC). IHC  
254 data showed that CsHscB mainly expressed on the oral sucker (OS), genital pore (GP),  
255 vitelline gland (VF), ovary (OV), testis (TT) and eggs (EG) (Fig. 1E). It could be  
256 detected by the sera from *C. sinensis*-infected mice as well as *C. sinensis* crude  
257 antigen- immunized mice, suggesting that rCsHscB was recognized by pool of  
258 antibodies induced by *C. sinensis* and crude antigen as well. It is also suggested that  
259 CsHscB naturally existing in *C. sinensis*- infection mice and worm's crude antigens  
260 can trigger host immune responses (Fig. S 1).

### 261 **rCsHscB induces the activation of macrophage and cytokine production**

262 To test whether rCsHscB has the capacity to induce the activation of innate immune  
263 cells or not, we used a macrophage cell line-RAW 264.7 that were stimulated by  
264 various concentrations of rCsHscB at different time-points. Firstly, we test toxicity of

265 rCsHscB to macrophages, lactate dehydrogenase (LDH) test showed that up to 20  $\mu\text{g}$   
266 /ml of rCsHscB protein displayed no cellular toxicity against macrophages (the data is  
267 not shown). Furthermore, endotoxin (LPS) in the purified rCsHscB was removed by  
268 Endotoxin Erasol Solution (Tiandz, Beijing, China) in order to exclude any potential  
269 effects of LPS produced during preparation of rCsHscB. The concentration of  
270 endotoxin was detected by Limulus Amebocyte Lysate (LAL) and rCsHscB solution  
271 with less than 0.1 EU/ml of endotoxin should be further studied. For assessment of the  
272 activation of macrophages, we detected activation markers of macrophages upon  
273 stimulation using flow cytometry. The data showed that stimulation of macrophage  
274 with rCsHscB (20  $\mu\text{g}/\text{ml}$ ) for 24 h augmented the surface expression of activation  
275 markers such as TLR2, CD80, CD86, MHCII, CD206 and CD11b (Fig. 2A~F). We  
276 also detected these cytokines with various concentrations (5~20  $\mu\text{g}/\text{ml}$ ) of rCsHscB at  
277 different time courses, it was shown that macrophages stimulated by 5~20  $\mu\text{g}/\text{ml}$   
278 rCsHscB for 12 h produced high levels of TNF- $\alpha$  (Fig. 2G). In addition, rCsHscB  
279 with the concentration of 5~10  $\mu\text{g}/\text{ml}$  but not 20  $\mu\text{g}/\text{ml}$  for 24 h still induced a robust  
280 secretion of TNF- $\alpha$  produced by macrophage (~3 times greater than  
281 DMEM-stimulated cells, Fig. 2G). The cells also produced high levels of IL-6 under  
282 the stimulation with 5~20  $\mu\text{g}/\text{ml}$  rCsHscB for 12 h or 24 h, compared with  
283 medium-stimulated cells (Fig. 2H,  $P<0.05$ ). With regard to IL-10, cells stimulated  
284 with 5~20  $\mu\text{g}/\text{ml}$  rCsHscB for 12 h or 24 h could produce a robust increase of IL-10,  
285 of note, the secretion of IL-10 in macrophage stimulated by 20  $\mu\text{g}/\text{ml}$  rCsHscB for 24  
286 h was more than 10 times greater than that of DMEM-stimulated cells (Fig. 2I). We

287 also tested the levels of IL-4 and IL-12 produced by rCsHscB-stimulated macrophage,  
288 but the data showed that the macrophage stimulated by rCsHscB didn't increase the  
289 production of IL-4 and IL-12 (the data is not shown).

290 To exclude any potential effects of endotoxin and other potential component produced  
291 during preparation of rCsHscB on the activation of macrophage, we also compared  
292 the productions of *E. Coli* induced by pET-28a vector with or without CsHscB open  
293 reading frame (pET-28a-CsHscB or control vector), the production induced by control  
294 vector could not stimulate macrophage to secrete high levels of IL-10 and TNF- $\alpha$  (Fig.  
295 S2A and Fig. S2B). However, it seems that the cells that were stimulated by the  
296 production expressed by control vector also secreted a higher level of IL-6, compared  
297 with DMEM stimulated cells, although the level of IL-6 was still lower than that of  
298 pET-28a-CsHscB-induced cells, suggesting that the increased secretion of IL-6 may  
299 be not exclusively induced by rCsHscB (Fig. S2C). Together, these data demonstrate  
300 that rCsHscB induces the activation of macrophage and triggers a robust cytokines  
301 production by the macrophage.

302

303 **rCsHscB is an unidentified agonist for TLR2 to induce immune responses of**  
304 **macrophage**

305

306 As the lipoproteins or lipopeptides have been reported as TLR2 agonist or ligand [18],  
307 we next test whether rCsHscB as an agonist for TLR2 to promote the activation of  
308 macrophage or not. Firstly, we performed *in silico* molecular docking using the crystal

309 structure of the extracellular domain (ECD) of mouse TLR2 and modeled 3D  
310 structure of rCsHscB by homology modeling. Molecular docking showed that  
311 CsHscB could bind with TLR2 at its leucine-rich region (LRR) 11~15 sites of ECD  
312 (Fig. 3A). To further ascertain whether rCsHscB physically interacts with the TLR2  
313 molecule or not, we performed a pull-down assay using whole-cell extracts from  
314 RAW247.6 cells stimulated by rCsHscB. The cell extracts were incubated with  
315 rCsHscB immobilized on Ni-NTA beads. TLR2 Pull down assay revealed that  
316 supernatant of lysate from *E. Coli* transfecting with pET-28a-CsHscB vectors as well  
317 as purified rCsHscB proteins could pull-down TLR2 molecule as showed by  
318 western-blot (Fig. 3B line 2 and line 3), demonstrating that TLR2 and rCsHscB could  
319 be physically interacted. However, if rCsHscB (control vectors for example) absence,  
320 no bands were observed on the gel of western-blot, which suggested there is no  
321 interactions between TLR2 and other molecules except rCsHscB (Fig. 3B line 1 and  
322 line 4). Collectively, these data suggested that rCsHscB interacts specifically and  
323 predominantly with TLR2.

324 To test whether rCsHscB induced the cytokines production is dependent on TLR2 or  
325 not, TLR2 was blocked by pretreating RAW 264.7 cells with anti-TLR2 antibody  
326 (T2.5) for 2 h prior to the addition of rCsHscB. The secretion of IL-6 and IL-10  
327 induced by rCsHscB were almost abrogated following the addition of TLR2 blocking  
328 antibodies to the medium (Fig. 3D and Fig. 3E). Similarly, rCsHscB-induced TNF- $\alpha$   
329 was also significantly abolished due to the presence of the TLR2 blocking antibody  
330 (Fig. 3F).

331

332 **rCsHscB-induced IL-10 production partly depends on phosphorylation of**  
333 **ERK1/2 but not p38 in RAW 264.7 cells**

334 IL-10 has been known as one of the mechanisms that contribute to induced regulatory  
335 responses induced by helminth infection (30). As our and others' previous studies  
336 suggest that IL-10 might play a regulatory role in immune responses during *C.*  
337 *sinensis* infection[17, 20-22], which highlight the significance of rCsHscB induced a  
338 strong IL-10 production in macrophage in our study, it is necessary to further study  
339 the mechanisms that IL-10 induced by rCsHscB. For this sense, to determine which  
340 downstream molecules mediated by TLR2 are responsible to robust rCsHscB-induced  
341 IL-10 production by macrophage, we screened the activation of transcription factors  
342 nuclear factor- $\kappa$ B (NF- $\kappa$ B), p38 mitogen-activated protein kinase and ERK1/2 in  
343 RAW264.7 cells using optimal concentrations (20  $\mu$ g/ml) of rCsHscB during various  
344 time courses, western blot showed that rCsHscB induced a robust phosphorylation of  
345 ERK1/2 after 20~30 min and then the levels of phosphorylation of ERK1/2 was  
346 attenuated during 60 min~120 min following stimulation with rCsHscB (Fig. 4A).  
347 Surprisingly, there was no obviously activation of NF- $\kappa$ B nor p38 during these time  
348 courses. Furthermore, we also examined whether the rCsHscB-induced  
349 phosphorylation of ERK1/2 was mediated by TLR2 signaling. RAW264.7 cells were  
350 pretreated with blocking antibodies of TLR2 or with isotype control and  
351 phosphorylation of ERK1/2 was measured by western blot. Western blot showed  
352 that phosphorylation of ERK1 but not ERK2 was solely abolished following the



353 addition of TLR2 blocking antibodies to the cultures, compared with isotype-matched  
354 control. Furthermore, we used a specific inhibitor for ERK1/2 (PD98059) to examine  
355 whether rCsHscB-induced cytokines was mediated by ERK signaling pathway or not.  
356 The RAW264.7 cells were pretreated with 10  $\mu$ M PD98059 for 2 h, and then  
357 stimulated by 20  $\mu$ g/ml rCsHscB for 24 h, the supernatants were collected for IL-10  
358 detection. The data showed that the level of IL-10 was significantly decreased when  
359 ERK1/2 was inhibited by PD98059 in macrophage that was stimulated by rCsHscB  
360 for 24 h (Fig. 4C,  $P < 0.001$ , ~50% decreased).

361

362 **rCsHscB-induced IL-10 production depends on TLR2-mediated ERK1/2**  
363 **signaling in bone marrow-derived macrophage**

364

365 To ascertain the roles of TLR2-regulated ERK1/2 signaling in rCsHscB-induced  
366 IL-10 in macrophage, we induced bone marrow-derived macrophage (BMDM) from  
367 *Tlr2* wild type and *Tlr2*<sup>-/-</sup> mice. Similar to our previous data, rCsHscB could potently  
368 induced a strong TLR2 expression on the surface of BMDM sourced from wild type  
369 mice (Fig. 5A, almost 2 fold changes) and the levels of IL-10 were significantly  
370 increased when BMDM cells from *Tlr2* wild-type mice were stimulated at various  
371 concentration of rCsHscB (5~40  $\mu$ g/ml), compared with medium or the production of  
372 *E. coli* transfected by empty vector (Fig. 5B,  $P < 0.001$ ). Furthermore, the production  
373 of IL-10 reached peak at the concentration of 20  $\mu$ g/ml (almost 6 times increase).  
374 However, rCsHscB-induced IL-10 production in BMDM from TLR2 knockout mice

375 was nearly abrogated (Fig. 5C).

376

377 To verify whether rCsHscB-induced IL-10 production was depended on TLR2  
378 mediated ERK1/2 signaling pathway, we used an inhibitor of ERK1/2 pretreated  
379 BMDM cells sourced from TLR2 wild type and TLR2 knockout mice and then  
380 stimulated by 20 $\mu$ g/ml rCsHscB for 24 h, IL-10 production in the culture were  
381 detected using ELISA. Again, the secretion of IL-10 in BMDM cells from TLR2  
382 knockout mice was almost abolished when BMDM cells were stimulated by rCsHscB  
383 for 24 h (Fig. 5C). For TLR2 wild type BMDM cells, it showed that there was a  
384 significant decrease of IL-10 production in the BMDM cells with pretreatment of  
385 PD98059, compared with the cells pretreated by DMSO (the vehicle for PD98059).  
386 Furthermore, the data also demonstrated that the production of IL-10 was remarkably  
387 decreased (~4 times decreased, Fig. 5C) in rCsHscB stimulated BMDM cells derived  
388 from *Tlr2*<sup>-/-</sup> mice compared with that from *Tlr2* wild type mice. Collectively, our data  
389 demonstrated that rCsHscB induced IL-10 production in macrophage depends on the  
390 activation of TLR2-dependent ERK1/2 signaling.

391

392 **rCsHscB could induce IL-10 in the liver of mice dependently by TLR2 mediated**  
393 **signaling pathway**

394

395 To test whether rCsHscB could induce IL-10 production mediated by TLR2/ERK1/2  
396 signaling pathway *in vivo* or not, the mice with or without *Tlr2* were both received

397 rCsHscB (5 mg /kg body weight) or PBS by *i. v.* for 24 h, the levels of IL-10 in the  
398 hepatic homogenate were determined. The data showed that rCsHscB induced a  
399 higher level of IL-10 in the liver of mice, compared with the PBS group (Fig. 6A,  
400  $P < 0.01$ ). However, IL-10 production in the liver from *Tlr2*<sup>-/-</sup> mice were significantly  
401 lower than those in wild type mice when they were both received with the same dose  
402 of rCsHscB (Fig. 5D,  $P < 0.01$ ), but there was no any statistic difference in IL-10 in  
403 supernatant of hepatic homogenate in rCsHscB *Tlr2*<sup>-/-</sup> mice and those from PBS  
404 treated *Tlr2*<sup>-/-</sup> mice (Fig. 5D,  $P > 0.05$ ), suggesting that rCsHscB also induced IL-10  
405 production in a TLR2 dependent manner *in vivo*. Furthermore, we also found that the  
406 phosphorylation of ERK1/2 in livers of *Tlr2*<sup>-/-</sup> mice was also attenuated, compared  
407 with *Tlr2* wild type mice following administration of the same dose of rCsHscB (Fig.  
408 5E). Collectively, these data demonstrated that rCsHscB could induce IL-10  
409 production mediated by TLR2/ERK1/2 signaling pathway *in vivo*.

410 *C. sinensis* has evolved complex mechanisms for resistance to immune responses.  
411 Zhao et al demonstrated that total protein from *C. sinensis* inhibited Th1 immune  
412 responses by activation of mannose receptor (MR), but not TLR2 or TLR4 to induce  
413 Th2-skewed response [14]. Our previous study showed that TLR4 plays a regulatory  
414 role in the secretion of *C. sinensis* ESPs induced type I-relative cytokines (such as  
415 IFN- $\gamma$ , IL-12, IL-6, TNF- $\alpha$ ) [13]. However, the evidence suggests that the complex  
416 mechanisms for host-parasites interaction during *C. sinensis* infection are still poorly  
417 understood.

418 Many lipoproteins or lipo-peptide have been reported to display TLR2 ligands or

419 agonists activities such as *Mycobacterium tuberculosis* (Mtb) LprG [5], Mtb LprA  
420 [23], *schistosomal* lyso-PS [8] and filarial Diacyl WoLP [9]. Thus, to identify the  
421 potential TLR2 agonist sourced from *C. sinensis*, we screened the *C. sinensis* proteome  
422 data and predicted the potential lipoproteins using bioinformatic analysis. A  
423 lipoprotein from the family Co-chaperone Hsc20 (CsHscB) was ultimately selected  
424 for further study. However, it is very difficult to purify CsHscB directly from the  
425 worms due to lack of sufficient the background information as well as the low yield.  
426 We therefore used a recombinant CsHscB by *E. coli*, which was also recognized by  
427 sera of *C. sinensis* infect-mice, suggesting that rCsHscB remains the immunogenicity  
428 of *C. sinensis* rCsHscB. It was found that rCsHscB with the concentration of 5~20  
429  $\mu\text{g/ml}$  could induce a strong production of IL-10 by macrophage in a dose-dependent  
430 manner. Similarly, it have been also demonstrated that recombinant PPE18 from *M.*  
431 tuberculosis or Pam<sub>3</sub>CSK<sub>4</sub> known as the TLR2 ligands also trigger the activation of  
432 macrophages and production of IL-10 in a dosed manner by specific interaction with  
433 TLR2 [24, 25]. Therefore, 20  $\mu\text{g/ml}$  of rCsHscB was used as the optimized  
434 concentration for further study.

435 Pull-down assay is a useful approach to verify the protein-protein interaction *in*  
436 *vitro*. Using this assay, Chen et al. demonstrated that recombinant MPT83 derived  
437 from *M. tuberculosis* interacts specifically with TLR2 to promote the function of  
438 macrophage [26]. Our data suggested that rCsHscB sourced from *C. sinensis* might  
439 acting as a TLR2 agonist plays a regulatory role in the immune responses to *C.*  
440 *sinensis* infection. However, the mechanisms by which TLR2 interact with rCsHscB

441 are not known due to its complexity and further studies should be warranted.

442       During chronic infection, parasite products trend to induce strong regulatory  
443 responses which may be in charge of balanced host-parasite interaction whereby the  
444 tissues damages were impeded and worms' survival was favored. IL-10 has been  
445 known as one of the mechanisms that contribute to induced regulatory responses  
446 induced by helminth infection [27]. For example, the increase production of IL-10 is  
447 mainly responsible for induction of CD4<sup>+</sup> T cell hypo-responsiveness in the skin-  
448 draining lymph nodes after repeated exposure to *Schistosoma mansoni* larvae [28]. It  
449 is also evident that IL-10 sourced from CD4<sup>+</sup>CD25<sup>-</sup> effector T cells impairs IFN- $\gamma$   
450 production for the control of acute inflammation and myositis in the diaphragm  
451 caused by *Trichinella spiralis* as well[29, 30]. In respect of *C. sinensis*, it showed that  
452 augment IL-10 was triggered by dendritic cells treated by *C. sinensis* crude antigen  
453 [14, 31]. Furthermore, it found that IL-10 secreted by lymphocytes from FVB was  
454 significantly higher than by those of BALB/c mice, which suggests that IL-10 may  
455 contribute to the susceptibility of different strains mice [21, 32]. In our present study,  
456 rCsHscB interacted with TLR2 can potently IL-10 production in macrophage with  
457 various concentrations (5~20  $\mu$ g/ml), which may account for mechanisms underlying  
458 production of IL-10 driven by *C. sinensis* infection.

459       Macrophage is one of the important sources of IL-10 in responses to TLRs or  
460 other PRRs ligands. But the intrinsic mechanisms that tailored production of IL-10 are  
461 still poorly understood. MAPKs signaling pathway (such as ERK, p38 etc) have been  
462 suggested to be involved in the control of the production of IL-10[33]. In our present

463 study, we found that phosphorylated ERK but not p38 was activated in the responses  
464 to the stimulation of rCsHscB for 20~30 min. Furthermore, the phosphorylated  
465 ERK1/2 was inhibited when the cells were pretreated by TLR2 blocking antibodies  
466 whereby the production of IL-10 was almost impaired, which suggest that the  
467 activation of ERK induced by rCsHscB in macrophage is mediated by TLR2.  
468 Interesting, although the production of IL-10 in rCsHscB induced cells was  
469 significantly decreased when the cells were pretreated by PD98059, these amounts  
470 were still higher than DMEM controls. To confirm these data, we also used another  
471 macrophage model-bone marrow-derived macrophage isolated from TLR2 wild and  
472 TLR2 knockout mice. Similar to our previous observation, the BMDM from TLR2  
473 knockout mice impaired the secretion of IL-10 using the same amount of rCsHscB for  
474 stimulation, compared with those from *Tlr2*<sup>-/-</sup> mice, but IL-10 secreted by  
475 rCsHscB-induced macrophages from TLR2 wild type mice were partial depressed  
476 when ERK1/2 inhibitor were pretreated. These data suggested that, in addition to  
477 ERK, other signaling pathways may be also involved in TLR2-dependent the  
478 production of IL-10 in macrophage-induced by rCsHscB. In addition, we also found  
479 that rCsHscB could induced the production of IL-10 via TLR2/ERK signaling  
480 pathway in mice following intraperitoneal injection with rCsHscB 5 mg/kg body  
481 weigh for 24 h, although there was limitation that the concentration of rCsHscB used  
482 the study might be not associated with real *C. sinensis* infection. To exclude any  
483 potential other effects of rCsHscB, we employed bull serum albumin (BSA) as a  
484 control for *in vivo* study, the data showed that BSA had little effects on the production

485 of IL-10 as well as the activation of p-ERK *in vivo* (the data is not shown), which  
486 demonstrated rCsHscB could specially induce high level of IL-10 both *in vivo* and *in*  
487 *vitro*.

488 In conclusion, in the present study, we identified CsHscB sourced from *C.*  
489 *sinensis* acting as a novel TLR2 agonist to induce potently activation of macrophage,  
490 our study also demonstrates that a robust IL-10 production by rCsHscB-induced  
491 macrophage is dependent by TLR2-mediated ERK1/2 signaling pathway, which may  
492 reveal a novel mechanism for host-parasites recognition during *C. sinensis* infection.  
493 The present study will contribute to a better understanding of the interaction between  
494 the worms and host cells. In addition, rCsHscB might be suggested in the  
495 development of novel therapeutic strategies with implications beyond parasitology  
496 due to its potential regulatory capacities of immune responses.

497

#### 498 **Author Contributions**

499 CY and KYZ conceived and designed the experiments. FF and ZYZ performed the  
500 majority of experiments. YZ, JW, DX, HLL, YGW, QY and RXT contributed to the  
501 acquisition of data. CY and ZYZ wrote the paper. All authors read and approved the  
502 final manuscript.

503

#### 504 **Funding**

505 This study was supported by National Natural Science Foundation of China (Grant  
506 Nos: 81572019 to Kui-Yang Zheng and 81702027 to Qian Yu), Natural Science

507 Foundation of Jiangsu Province of China (Grant No. BK20171176 to Chao Yan),  
508 China Postdoctoral Science Foundation (Grant No. 2018M640525 to Chao Yan),  
509 Qinglan project of Jiangsu Province of China (to Chao Yan), Jiangsu Planned Projects  
510 for Postdoctoral Research Funds (No. 2018K053B to Chao Yan) and Priority  
511 Academic Program Development of Jiangsu Higher Education Institutions of China  
512 (Grant No. 1506 to Kui-Yang Zheng). The funders had no role in study design, data  
513 collection and analysis, decision to publish, or preparation of the manuscript.

514

#### 515 **Conflict of Interest Statement**

516 Author Hai-Liang Liu was employed by company CapitalBio Technology Inc. All  
517 other authors declare no competing interests.

#### 518 **References**

- 519 1. Grecnis RK (2015) Immunity to helminths: resistance, regulation, and susceptibility to  
520 gastrointestinal nematodes. *Annu Rev Immunol* **33**: 201-25
- 521 2. Maizels RM, Smits HH, McSorley HJ (2018) Modulation of Host Immunity by Helminths: The  
522 Expanding Repertoire of Parasite Effector Molecules. *Immunity* **49**: 801-818
- 523 3. MacKenzie KF, Clark K, Naqvi S, McGuire VA, Noehren G, Kristariyanto Y, van den Bosch M,  
524 Mudaliar M, McCarthy PC, Pattison MJ, *et al.* (2013) PGE(2) induces macrophage IL-10 production and  
525 a regulatory-like phenotype via a protein kinase A-SIK-CRTC3 pathway. *J Immunol* **190**: 565-77
- 526 4. Cao S, Zhang X, Edwards JP, Mosser DM (2006) NF-kappaB1 (p50) homodimers differentially  
527 regulate pro- and anti-inflammatory cytokines in macrophages. *J Biol Chem* **281**: 26041-50
- 528 5. Drage MG, Tsai HC, Pecora ND, Cheng TY, Arida AR, Shukla S, Rojas RE, Seshadri C, Moody DB,  
529 Boom WH, *et al.* (2010) Mycobacterium tuberculosis lipoprotein LprG (Rv1411c) binds triacylated  
530 glycolipid agonists of Toll-like receptor 2. *Nat Struct Mol Biol* **17**: 1088-95
- 531 6. Dunne A, Mielke LA, Allen AC, Sutton CE, Higgs R, Cunningham CC, Higgins SC, Mills KH (2015) A  
532 novel TLR2 agonist from Bordetella pertussis is a potent adjuvant that promotes protective immunity  
533 with an acellular pertussis vaccine. *Mucosal Immunol* **8**: 607-17
- 534 7. Shukla S, Richardson ET, Drage MG, Boom WH, Harding CV (2018) Mycobacterium tuberculosis  
535 Lipoprotein and Lipoglycan Binding to Toll-Like Receptor 2 Correlates with Agonist Activity and  
536 Functional Outcomes. *Infect Immun* **86**
- 537 8. van der Kleij D, Latz E, Brouwers JF, Kruize YC, Schmitz M, Kurt-Jones EA, Espevik T, de Jong EC,  
538 Kapsenberg ML, Golenbock DT, *et al.* (2002) A novel host-parasite lipid cross-talk. Schistosomal



- 539 lyso-phosphatidylserine activates toll-like receptor 2 and affects immune polarization. *J Biol Chem* **277**:  
540 48122-9
- 541 9. Turner JD, Langley RS, Johnston KL, Gentil K, Ford L, Wu B, Graham M, Sharpley F, Slatko B,  
542 Pearlman E, *et al.* (2009) Wolbachia lipoprotein stimulates innate and adaptive immunity through  
543 Toll-like receptors 2 and 6 to induce disease manifestations of filariasis. *J Biol Chem* **284**: 22364-78
- 544 10. Qian MB, Utzinger J, Keiser J, Zhou XN (2016) Clonorchiasis. *Lancet* **387**: 800-10
- 545 11. Kim TS, Pak JH, Kim JB, Bahk YY (2016) Clonorchis sinensis, an oriental liver fluke, as a human  
546 biological agent of cholangiocarcinoma: a brief review. *BMB Rep* **49**: 590-597
- 547 12. Humans IWGotEoCRt (2012) Biological agents. Volume 100 B. A review of human carcinogens.  
548 *IARC Monogr Eval Carcinog Risks Hum* **100**: 1-441
- 549 13. Hua H, Du Y, Ma R, Zhang BB, Yu Q, Li B, Xu JT, Li XY, Tang RX, Yan C, *et al.* (2018) The Regulatory  
550 Roles of Toll-Like Receptor 4 in Secretions of Type 1/Type 2 Relative Cytokines by Splenocytes and  
551 Dendritic Cells Exposed to Clonorchis sinensis Excretory/Secretory Products. *Inflammation* **41**:  
552 213-220
- 553 14. Zhao L, Shi M, Zhou L, Sun H, Zhang X, He L, Tang Z, Wang C, Wu Y, Chen T, *et al.* (2018)  
554 Clonorchis sinensis adult-derived proteins elicit Th2 immune responses by regulating dendritic cells via  
555 mannose receptor. *PLoS Negl Trop Dis* **12**: e0006251
- 556 15. Jin Y, Wi HJ, Choi MH, Hong ST, Bae YM (2014) Regulation of anti-inflammatory cytokines IL-10  
557 and TGF-beta in mouse dendritic cells through treatment with Clonorchis sinensis crude antigen. *Exp*  
558 *Mol Med* **46**: e74
- 559 16. Kim EM, Kwak YS, Yi MH, Kim JY, Sohn WM, Yong TS (2017) Clonorchis sinensis antigens alter  
560 hepatic macrophage polarization in vitro and in vivo. *PLoS Negl Trop Dis* **11**: e0005614
- 561 17. Yan C, Li XY, Li B, Zhang BB, Xu JT, Hua H, Yu Q, Liu ZZ, Fu LL, Tang RX, *et al.* (2015) Expression of  
562 Toll-like receptor (TLR) 2 and TLR4 in the livers of mice infected by Clonorchis sinensis. *J Infect Dev*  
563 *Ctries* **9**: 1147-55
- 564 18. Nguyen MT, Gotz F (2016) Lipoproteins of Gram-Positive Bacteria: Key Players in the Immune  
565 Response and Virulence. *Microbiol Mol Biol Rev* **80**: 891-903
- 566 19. Bendtsen JD, Nielsen H, von Heijne G, Brunak S (2004) Improved prediction of signal peptides:  
567 SignalP 3.0. *J Mol Biol* **340**: 783-95
- 568 20. Kim EM, Yu HS, Jin Y, Choi MH, Bae YM, Hong ST (2017) Local immune response to primary  
569 infection and re-infection by Clonorchis sinensis in FVB mice. *Parasitol Int* **66**: 436-442
- 570 21. Kim EM, Bae YM, Choi MH, Hong ST (2012) Cyst formation, increased anti-inflammatory  
571 cytokines and expression of chemokines support for Clonorchis sinensis infection in FVB mice.  
572 *Parasitol Int* **61**: 124-9
- 573 22. Uddin MH, Li S, Bae YM, Choi MH, Hong ST (2012) Strain variation in the susceptibility and  
574 immune response to Clonorchis sinensis infection in mice. *Parasitol Int* **61**: 118-23
- 575 23. Pecora ND, Gehring AJ, Canaday DH, Boom WH, Harding CV (2006) Mycobacterium tuberculosis  
576 LprA is a lipoprotein agonist of TLR2 that regulates innate immunity and APC function. *J Immunol* **177**:  
577 422-9
- 578 24. Nair S, Ramaswamy PA, Ghosh S, Joshi DC, Pathak N, Siddiqui I, Sharma P, Hasnain SE, Mande SC,  
579 Mukhopadhyay S (2009) The PPE18 of Mycobacterium tuberculosis interacts with TLR2 and activates  
580 IL-10 induction in macrophage. *J Immunol* **183**: 6269-81
- 581 25. Meng G, Grabiec A, Vallon M, Ebe B, Hampel S, Bessler W, Wagner H, Kirschning CJ (2003)  
582 Cellular recognition of tri-/di-palmitoylated peptides is independent from a domain encompassing the

- 583 N-terminal seven leucine-rich repeat (LRR)/LRR-like motifs of TLR2. *J Biol Chem* **278**: 39822-9
- 584 26. Chen ST, Li JY, Zhang Y, Gao X, Cai H (2012) Recombinant MPT83 derived from Mycobacterium
- 585 tuberculosis induces cytokine production and upregulates the function of mouse macrophages
- 586 through TLR2. *J Immunol* **188**: 668-77
- 587 27. Redpath SA, Fonseca NM, Perona-Wright G (2014) Protection and pathology during parasite
- 588 infection: IL-10 strikes the balance. *Parasite Immunol* **36**: 233-52
- 589 28. Prendergast CT, Sanin DE, Cook PC, Mountford AP (2015) CD4+ T cell hyporesponsiveness after
- 590 repeated exposure to *Schistosoma mansoni* larvae is dependent upon interleukin-10. *Infect Immun* **83**:
- 591 1418-30
- 592 29. Beiting DP, Gagliardo LF, Hesse M, Bliss SK, Meskill D, Appleton JA (2007) Coordinated control of
- 593 immunity to muscle stage *Trichinella spiralis* by IL-10, regulatory T cells, and TGF-beta. *J Immunol* **178**:
- 594 1039-47
- 595 30. Helmbj H, Grecis RK (2003) Contrasting roles for IL-10 in protective immunity to different life
- 596 cycle stages of intestinal nematode parasites. *Eur J Immunol* **33**: 2382-90
- 597 31. Wi HJ, Jin Y, Choi MH, Hong ST, Bae YM (2012) Predominance of IL-10 and TGF-beta production
- 598 from the mouse macrophage cell line, RAW264.7, in response to crude antigens from *Clonorchis*
- 599 *sinensis*. *Cytokine* **59**: 237-44
- 600 32. Zhang BB, Yan C, Fang F, Du Y, Ma R, Li XY, Yu Q, Meng D, Tang RX, Zheng KY (2017) Increased
- 601 hepatic Th2 and Treg subsets are associated with biliary fibrosis in different strains of mice caused by
- 602 *Clonorchis sinensis*. *PLoS One* **12**: e0171005
- 603 33. Gabrysova L, Howes A, Saraiva M, O'Garra A (2014) The regulation of IL-10 expression. *Curr Top*
- 604 *Microbiol Immunol* **380**: 157-90

605

606

607

608

609

610

611

612

613

614

615

616 **Figure legends**

617

618 **Figure 1. Identification, characterization and immunogenicity of *Clonorchis***  
619 ***sinensis* HscB.**

620 **A** Secondary structure of CsHscB including three domains: DnaJ, Co-chaperone HscB  
621 (CoHscB) and C-terminal oligomerisation (CTO).

622 **B** Multiple protein sequences alignment of CsHscB among different species of  
623 helminth.

624 **C** Signal peptide identification of CsHscB using SignalP server 3.0.

625 **D** Western-blot analysis of purified rCsHscB using anti-His antibody.

626 **E** Expression and distribution of rCsHscB in the *C. sinensis* adult worms using IHC.

627 a~b: rCsHscB on the worm bodies were detected using primary antibody of rCsHscB;

628 c~d: rCsHscB on the worm bodies were detected using IgG isotype as primary

629 antibody for controls. Arrows indicates the expression of rCsHscB mainly on the oral

630 sucker (OS), vitelline follicles (VF), genital pore (GP), testis (TT) and eggs (EG).

631 Scale bars, 20  $\mu$ m.

632

633 **Figure 2. rCsHscB induces the activation of macrophage and cytokine**  
634 **production.**

635 **A~F** rCsHscB increased the expression of macrophage activation markers by flow  
636 cytometry.

637 **G~I** productions of TNF- $\alpha$ (G), IL-6 (H) and IL-10 (I) were assayed for ELISA in the

638 macrophage stimulated by indicated concentrations of rCsHscB for different time  
639 courses.

640 Quantitative data are the mean±SE of three independent experiments, and all data  
641 shown are representative of at least three independent experiments. \* $P < 0.05$ , \*\* $P <$   
642  $0.01$ , and \*\*\* $P < 0.001$ , stimulated cells *versus* those cultured in medium alone.

643

644 **Figure 3. rCsHscB is a novel agonist for TLR2 to induce immune responses of**  
645 **macrophage.**

646 **A** Molecular docking analysis of binding TLR2 with CsHscB.

647 **B** Pull-down assay analysis of interaction of TLR2 and rCsHscB. The cells stimulated  
648 by supernatant of lysate from *E. Coli* transfecting with Vector controls (pET-28,  
649 His-tagged control, Lane 1), pET-28a-CsHscB vectors (pET-28-CsHscB, unpurified,  
650 Lane 2), purified rCsHscB-stimulated cells (Lane 3), binding buffer (Lane 4) and  
651 medium (Lane 6) for 24 h, the cells were lysed and incubated with rCsHscB  
652 immobilized on Ni-NTA beads, and bead-bound proteins were loaded onto a gel for  
653 immunoblotting for TLR2 and rCsHscB, respectively. Lane 5 represents negative  
654 control for pull-down assay;

655 **C~E** The production of IL-6 (C), IL-10 (D) and TNF- $\alpha$  (E) were hindered in  
656 rCsHscB-stimulated cells when TLR2 was blocked by neutralizing antibody.  
657 PM<sub>3</sub>CSK<sub>4</sub> were used as TLR2 ligand for positive controls.

658 Quantitative data are representative of mean  $\pm$  SEM of at least three independent  
659 experiments. \* $P < 0.05$ , \*\* $P < 0.01$ , and \*\*\* $P < 0.001$  compared with indicated

660 group.

661

662 **Figure 4. rCsHscB-induced IL-10 production partly depends on TLR2-mediated**  
663 **phosphorylation of ERK1/2 in RAW 264.7 cells.**

664 **A** ERK1/2 but not p38 MAPK was activated in rCsHscB-stimulated RAW 264.7  
665 macrophage for 20~120 min detected by western-blot.

666 **B** phosphorylation of ERK1 but not ERK2 was attenuated in rCsHscB-stimulated  
667 cells when TLR2 was blocked by neutralizing antibody determined by western-blot.

668 **C** ELISA analysis of IL-10 production in rCsHscB-stimulated RAW 264.7 cells the  
669 presence or absence of ERK1/2 inhibitor (PD98059).

670 Quantitative data are representative of mean  $\pm$  SEM of at least three independent  
671 experiments. \* $P < 0.05$ , \*\* $P < 0.01$ , and \*\*\* $P < 0.001$  compared with indicated  
672 group.

673

674 **Figure 5. rCsHscB-induced IL-10 production depends on TLR2 *in vitro* and *in***  
675 ***vivo*.**

676 **A** Flow cytometry analysis of TLR2 high F4/80<sup>+</sup>CD11b<sup>+</sup> in DMEM stimulated and  
677 rCsHscB-stimulated BMDMs from wild type mice.

678 **B** ELISA analysis of IL-10 production in BMDMs cells from wild type and *Tlr2*<sup>-/-</sup>  
679 mice stimulated with various concentrations of rCsHscB as indicated. DMEM as  
680 negative control. pET-28 group represents supernatant of lysate from E. Coli  
681 transfecting with pET-28a empty vector.

682 **C** ELISA analysis of IL-10 production in BMDMs cells from wild type and *Tlr2*<sup>-/-</sup>  
683 mice stimulated with rCsHscB (20 µg/ml) with or without of ERK1/2 inhibitor  
684 (PD98059). PM3CSK4 were used as TLR2 ligand for positive controls.

685 **D** The mice of wild type and *Tlr2* KO mice (~20 g) were administrated with 20 µg  
686 rCsHscB or PBS for 24 h *i. v.*, and the mice were sacrificed and the liver from each  
687 mouse was collected for IL-10 detection. IL-10 production in supernatant of hepatic  
688 homogenate from each group was determined by ELISA.

689 **E** Phosphorylation of ERK1/2 was attenuated in the liver of *Tlr2* KO mice that were  
690 received rCsHscB determined by western-blot. Quantitative data are representative of  
691 mean ± SEM of at least three independent experiments. Quantitative data are  
692 representative of mean ± SEM of at least three independent experiments. \**P* < 0.05,  
693 \*\**P* < 0.01, and \*\*\**P* < 0.001 compared with indicated group.

694

695

696

697

698

699

700

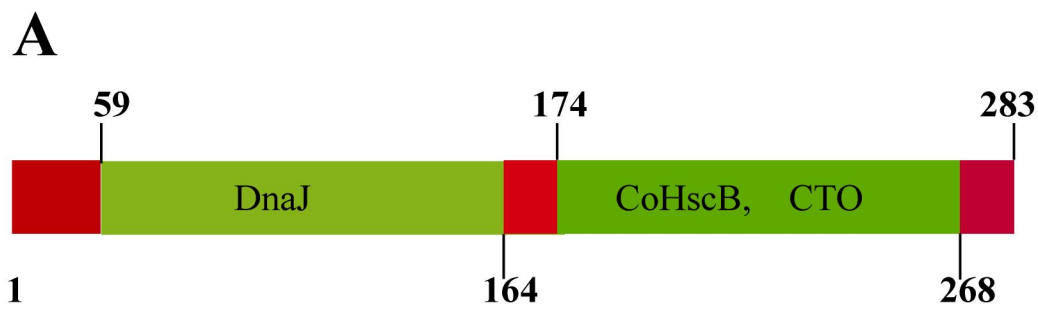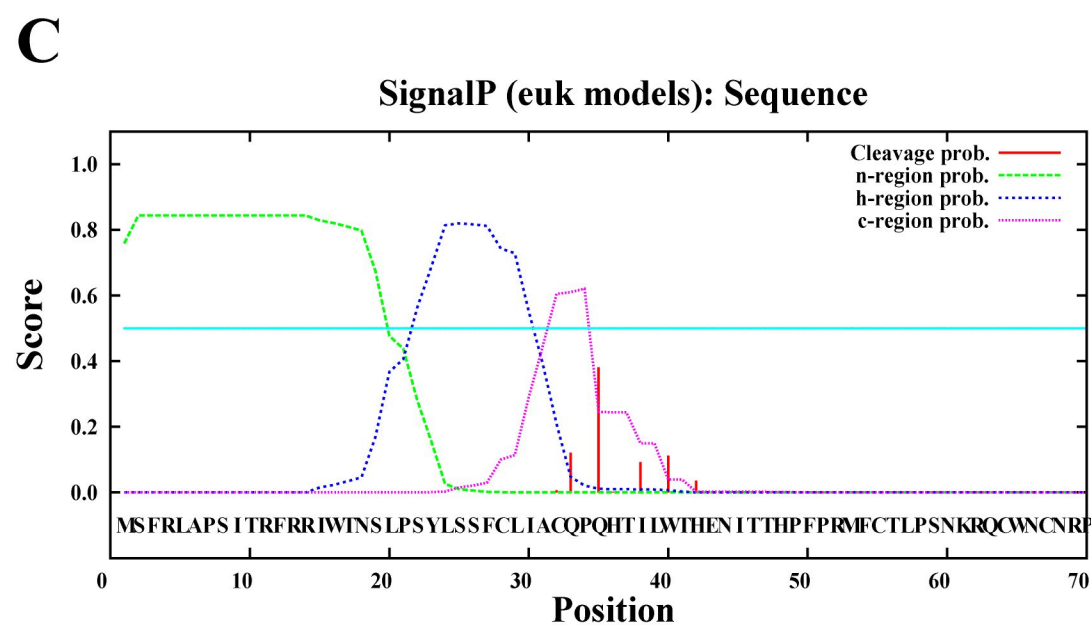

**D**

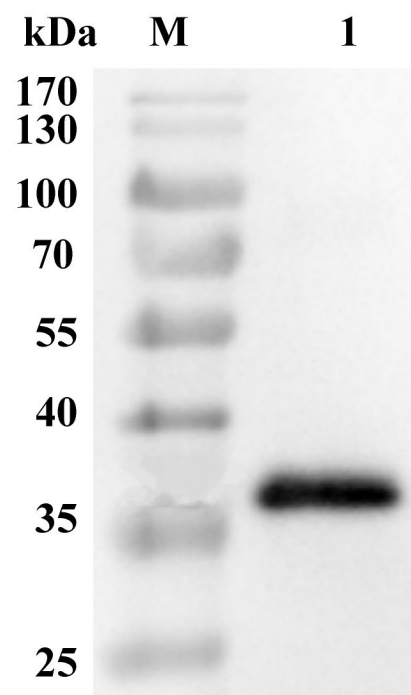

**B**

*C. sinensis* 1 MSFRLAPSI TRFRRIWNSLP SYLSSFC LIACQPQHT I LWTHEN I TTHPFRMFCTLP SN  
1  
*O. viverrini* 1  
*S. mansoni* 1  
*E. granulosus* 1  
Consensus 1 s

*C. sinensis* 61 KRQCWNCNRPV RDNEFFCECGKIQPVERDWTYFEVLGYGEP TVHIDLADLAQRMRETQKR  
1 PVERGWTYFEVLGYGEP TVHIDLADLAQRMRETQKR  
*O. viverrini* 3 EFTCWSCRLVKLLAFFCECGKVPVSPNWSYFDVVLGYPNPEPVVDVIELEDRMRRTQKL  
3 EFTCWSCRLVKLLAFFCECGKVPVSPNWSYFDVVLGYPNPEPVVDVIELEDRMRRTQKL  
*S. mansoni* 1 ERDCWSCRLRRISCFTEFFCECGKVQSFSPSNWYFDYFGTTPTRIDLNELSRMKRKLQMA  
1 ERDCWSCRLRRISCFTEFFCECGKVQSFSPSNWYFDYFGTTPTRIDLNELSRMKRKLQMA  
*E. granulosus* 61 r cws c r vrdn ffcecgkvqpv WtYFevlGygePtvhIDLadLaqrmRetQkr  
61 r cws c r vrdn ffcecgkvqpv WtYFevlGygePtvhIDLadLaqrmRetQkr

*C. sinensis* 121 LHPDKFSRTTPYEQELAADAATFVNRAYAMLECPESRFAYFLSLHHPSEDASNTDILD  
121 LHPDKFSRTTPYEQELAADAATFVNRAYAMLECPESRFAYFLSLHHPSEDASNTDILD  
*O. viverrini* 37 LHPDKFTRITTPYEQELAADAATFVNRAYAMLECPESRFAYFLSLHHPSEDASNTDILD  
37 LHPDKFTRITTPYEQELAADAATFVNRAYAMLECPESRFAYFLSLHHPSEDASNTDILD  
*S. mansoni* 63 LHPDKFSAKTQYERELASDASAYVNKAYSCLQKEVERVBYLHLHGVSTDDVIFRKSDDT  
63 LHPDKFSAKTQYERELASDASAYVNKAYSCLQKEVERVBYLHLHGVSTDDVIFRKSDDT  
*E. granulosus* 61 FHPDKFARSTKEEREIATTVSTQINDARTVLSNEITRABYILTLC-NPCSEEDVAITDT  
61 FHPDKFARSTKEEREIATTVSTQINDARTVLSNEITRABYILTLC-NPCSEEDVAITDT  
Consensus 121 LHPDKFsrTtpyEqelAada tfvNrAyamLe PesRf YfLsLhgpsedasdntdild

*C. sinensis* 181 DFLTEMLELNEEIEEFSELITAVKEKRHEASKLSVLLKELLHRISQDLMTERAKLVTAID  
181 DFLTEMLELNEEIEEFSELITAVKEKRHEASKLSVLLKELLHRISQDLMTERAKLVTAID  
*O. viverrini* 97 GFLTEMLELNEEIEEFSELITAVKEKRHEASKLSVLSKELLHRISQDLMAERAKLVTAID  
97 GFLTEMLELNEEIEEFSELITAVKEKRHEASKLSVLSKELLHRISQDLMAERAKLVTAID  
*S. mansoni* 123 EFLSEVMNTRKVEEVIHDVSNLSRSEKTVSGLSDTISELVGETRQRLDDDEKIIISLIS  
123 EFLSEVMNTRKVEEVIHDVSNLSRSEKTVSGLSDTISELVGETRQRLDDDEKIIISLIS  
*E. granulosus* 120 AFLTDVLEANEHVDELAEMVKTEECKQ----TLERVLAAYAIWTRWGREMDQLTRFID  
120 AFLTDVLEANEHVDELAEMVKTEECKQ----TLERVLAAYAIWTRWGREMDQLTRFID  
Consensus 181 FLtemlelnEeieEfselltavkekrheaskLsv lkeLlhrisq lm Eraklvtaid

*C. sinensis* 241 EARWKDAQALLNKCRYLSRTFDRLKEYELDWRVGIIVDIPPH  
157 EARWKDAHALLNK-----  
*O. viverrini* 183 KSDWAGALISLSRFRYILKVFEELEBEYETAWKQIGINW-----  
183 KSDWAGALISLSRFRYILKVFEELEBEYETAWKQIGINW-----  
*S. mansoni* 176 AANWEAAHQASRLRYEERLKKRIQDLRFDATRGI-----  
176 AANWEAAHQASRLRYEERLKKRIQDLRFDATRGI-----  
*E. granulosus* 241 earWkdAhall k ryl rvfdrlkeye dwr vgi v  
241 earWkdAhall k ryl rvfdrlkeye dwr vgi v

**E**

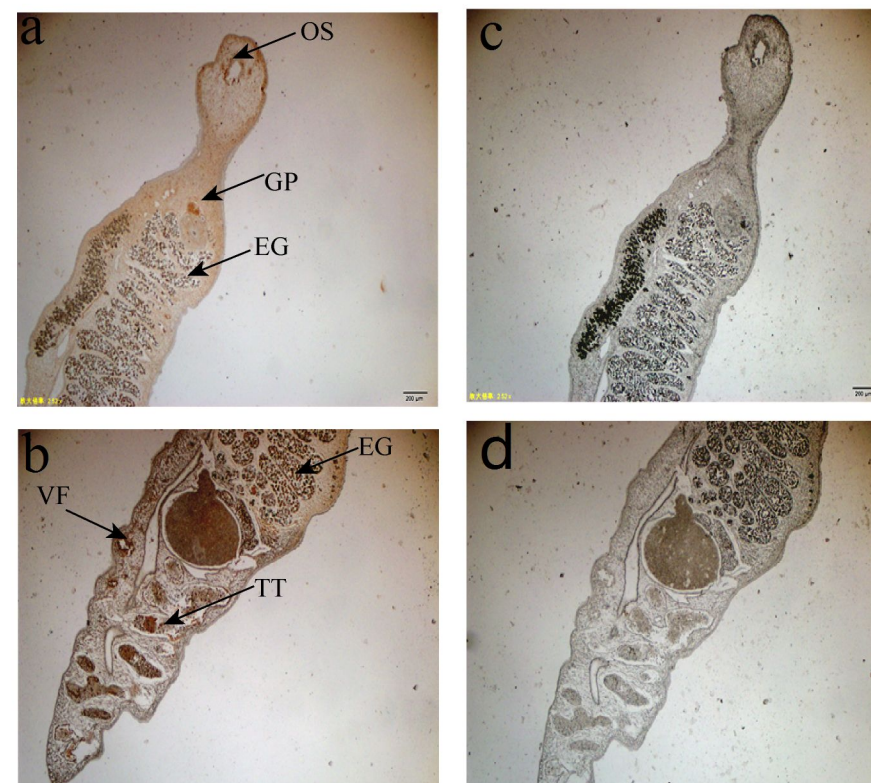

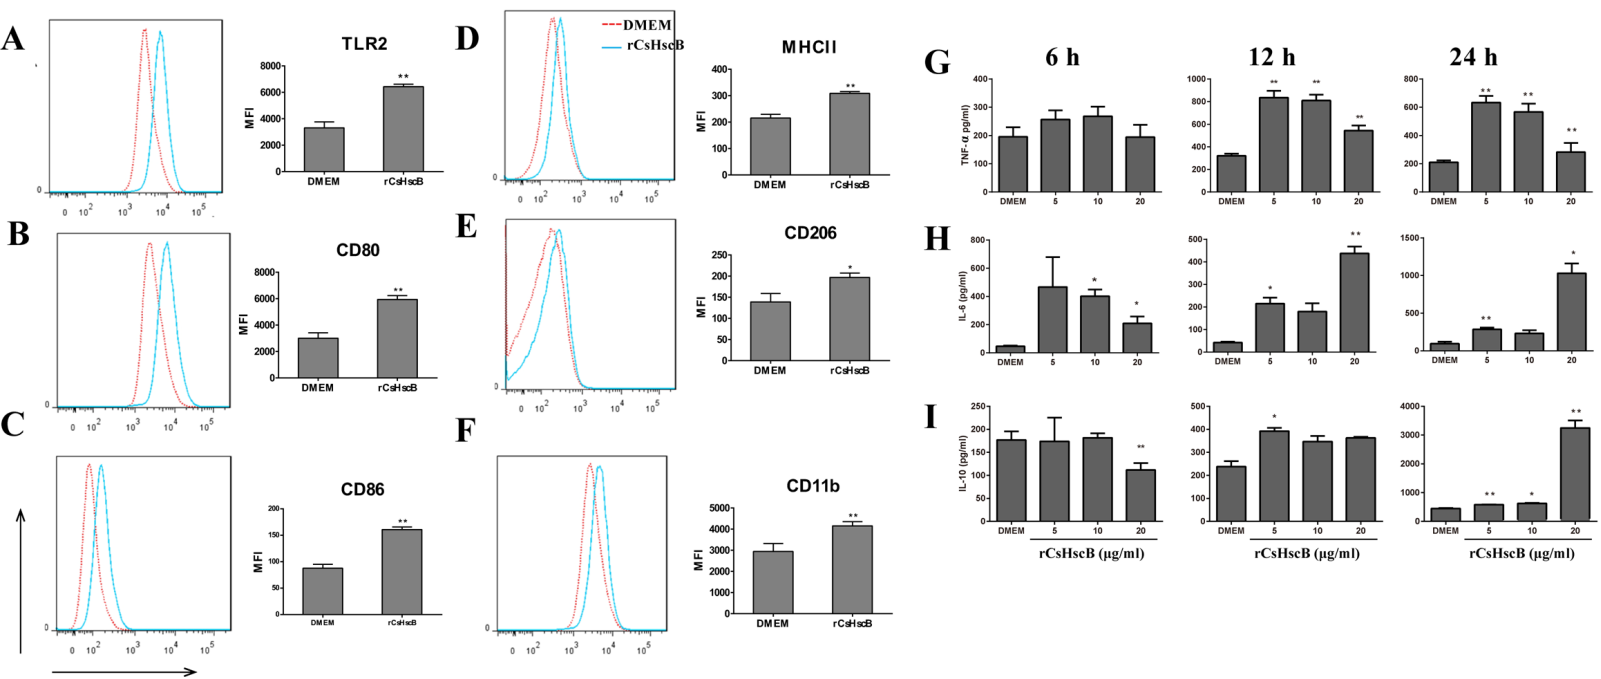



**A**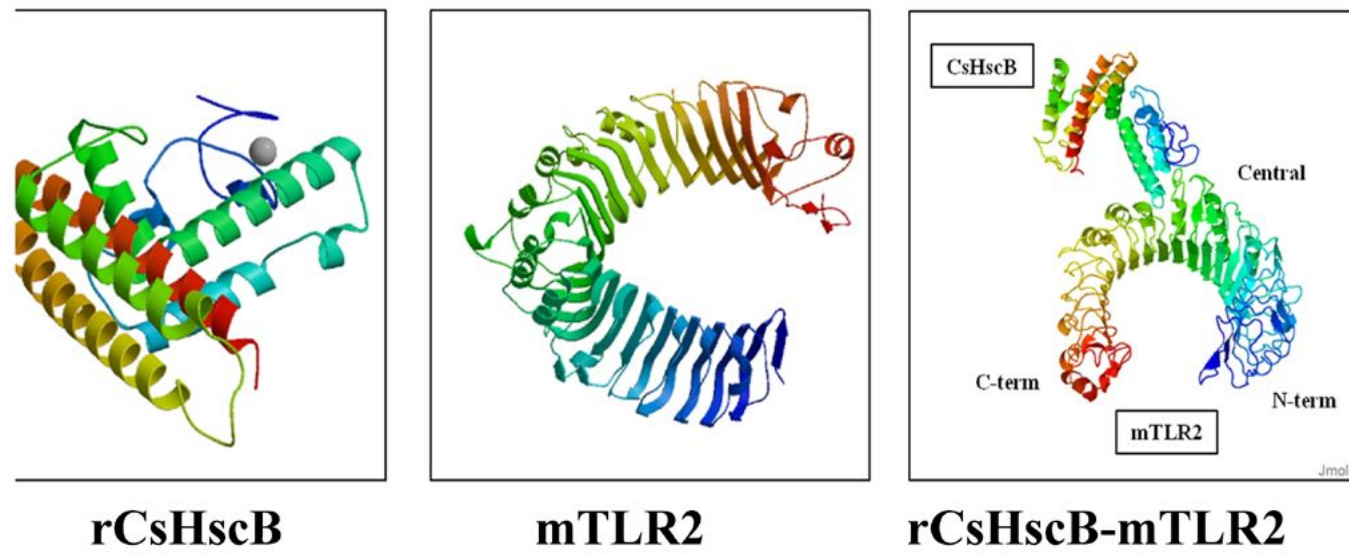**B**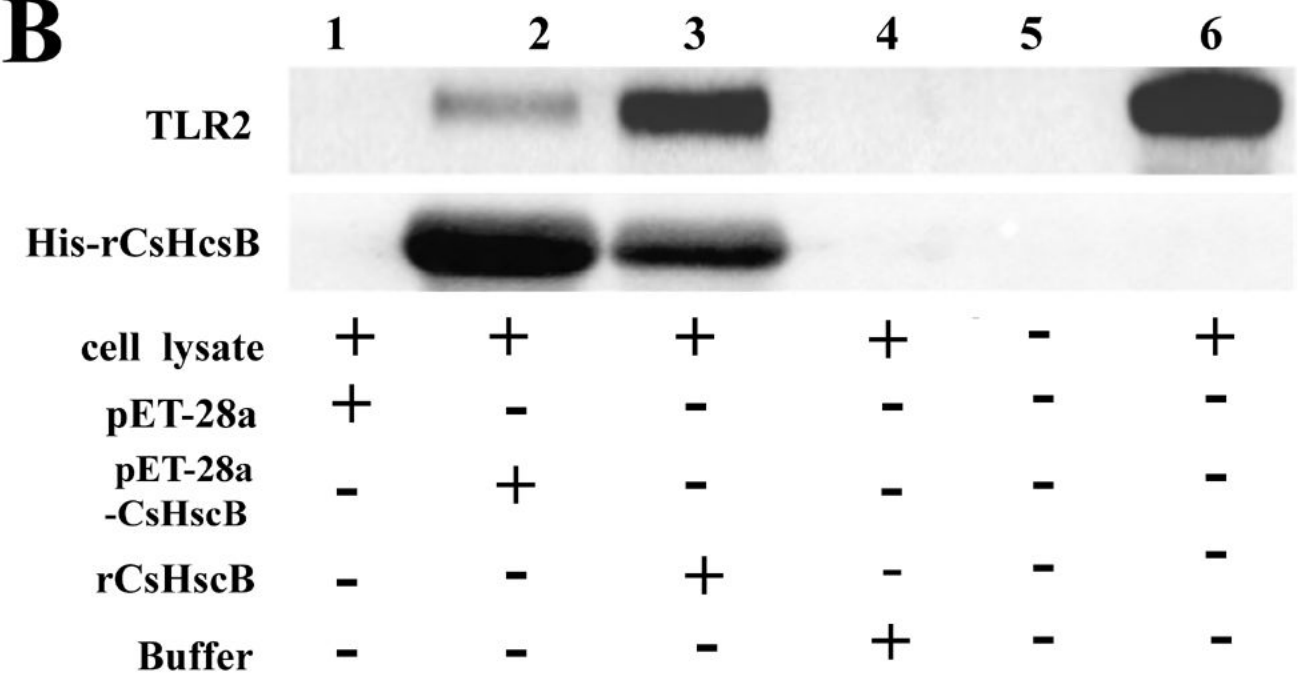**C**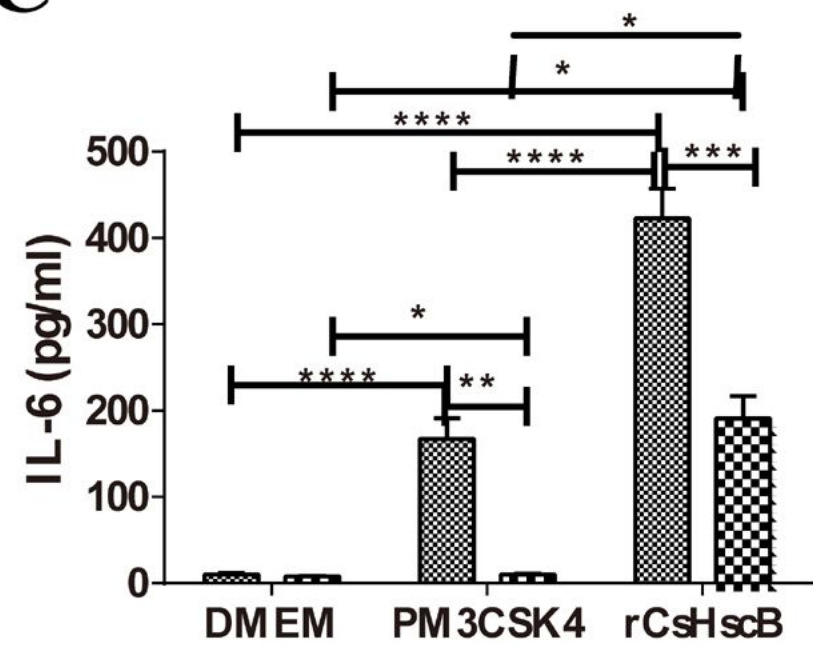**D**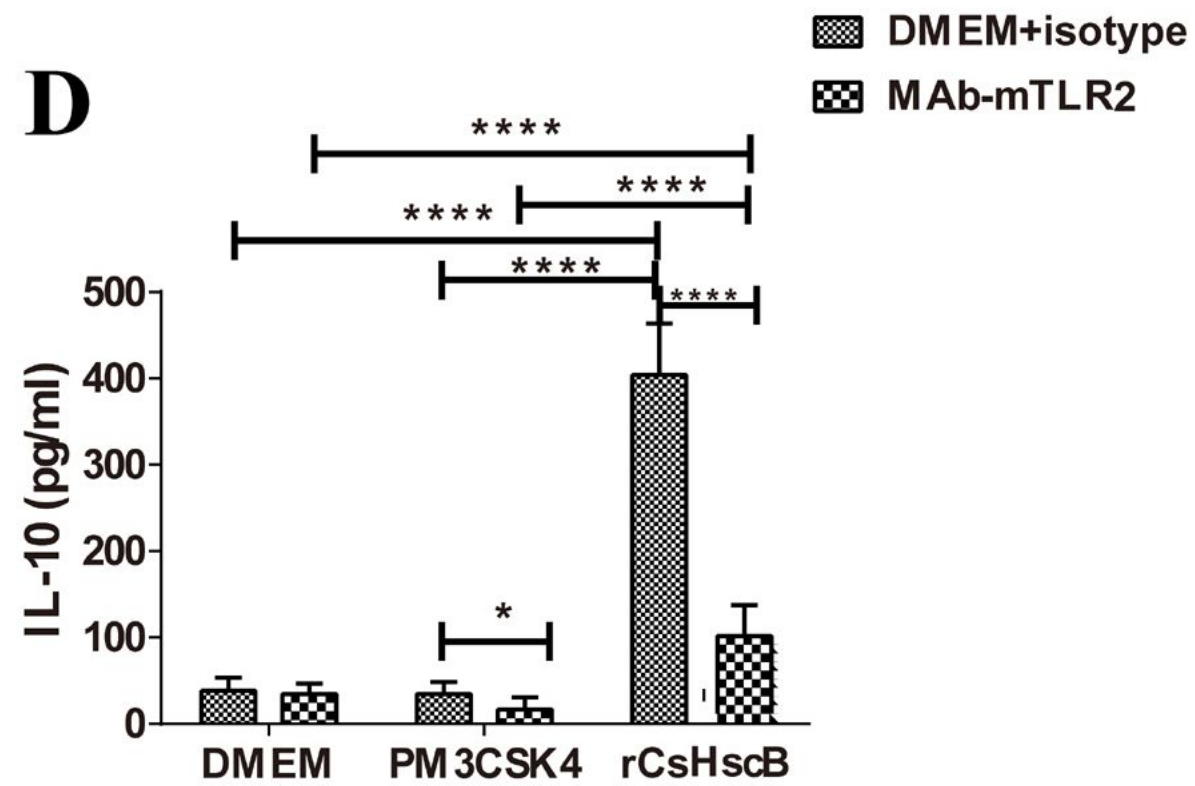**E**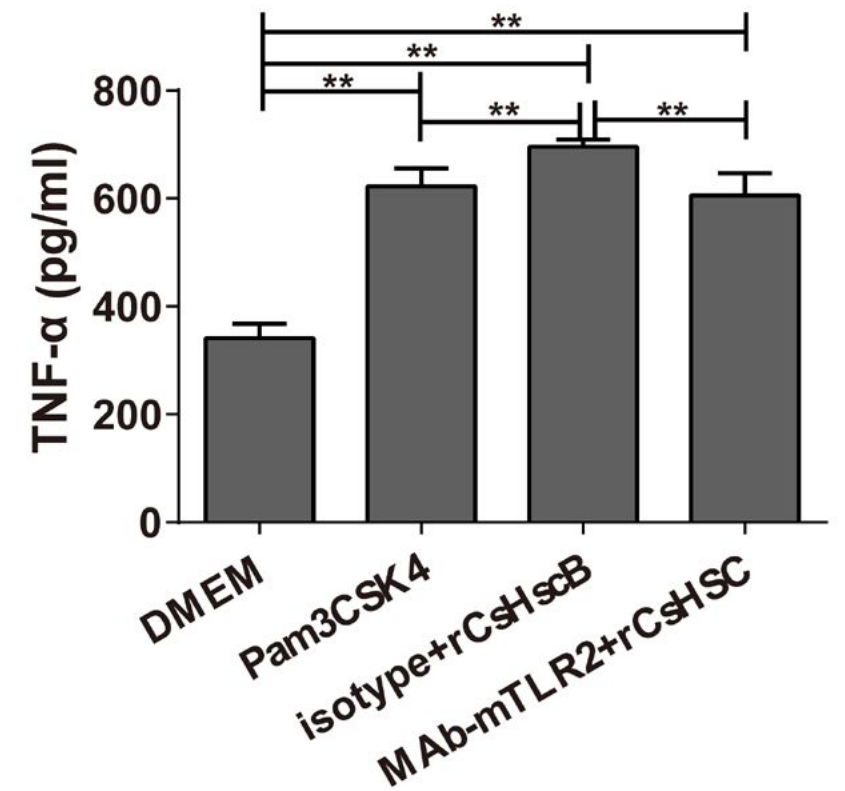

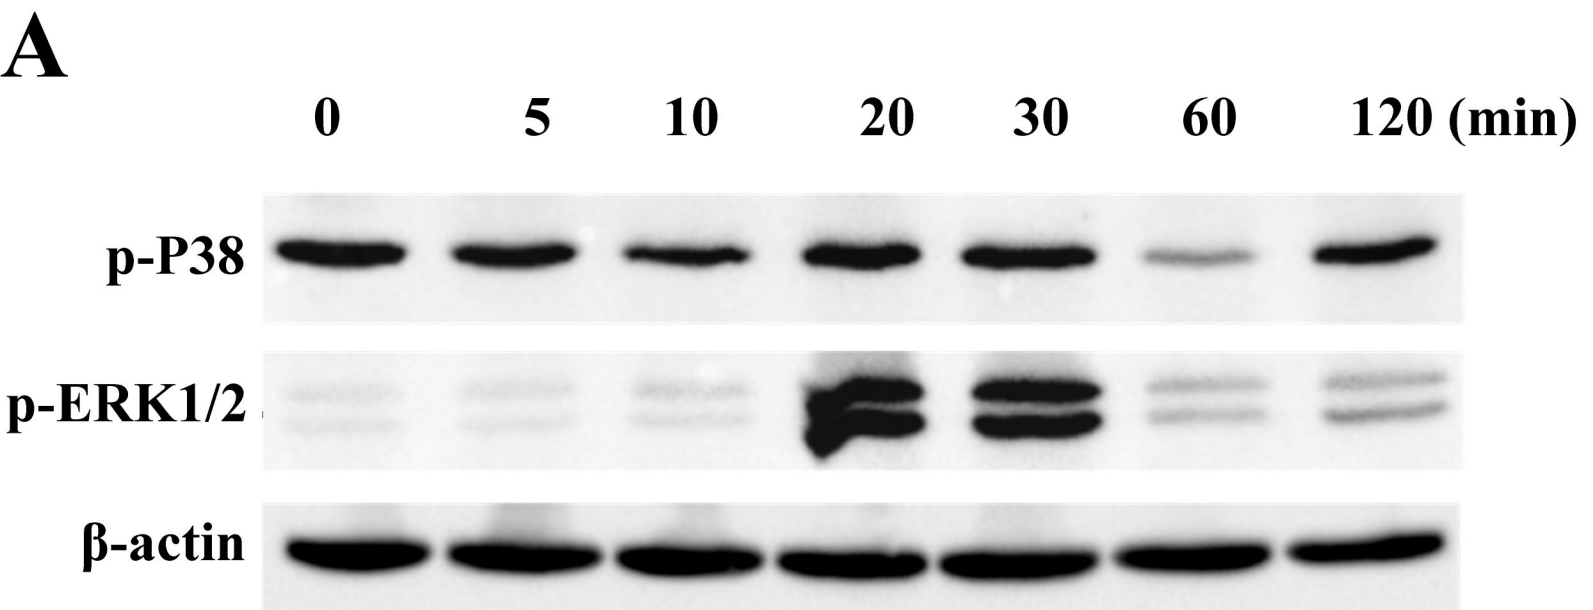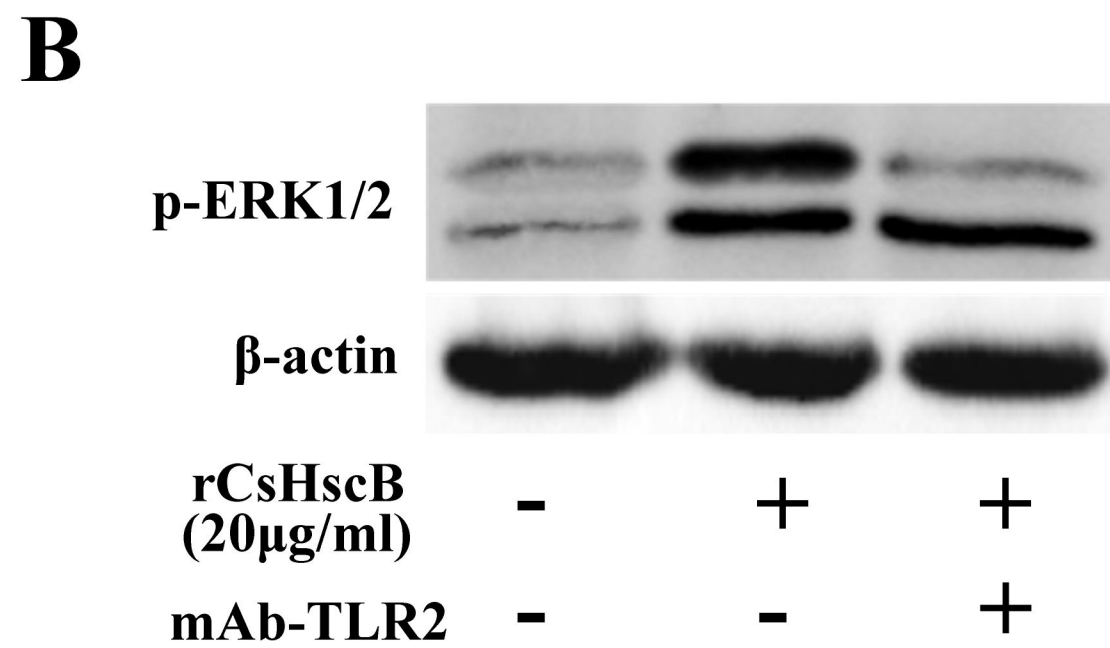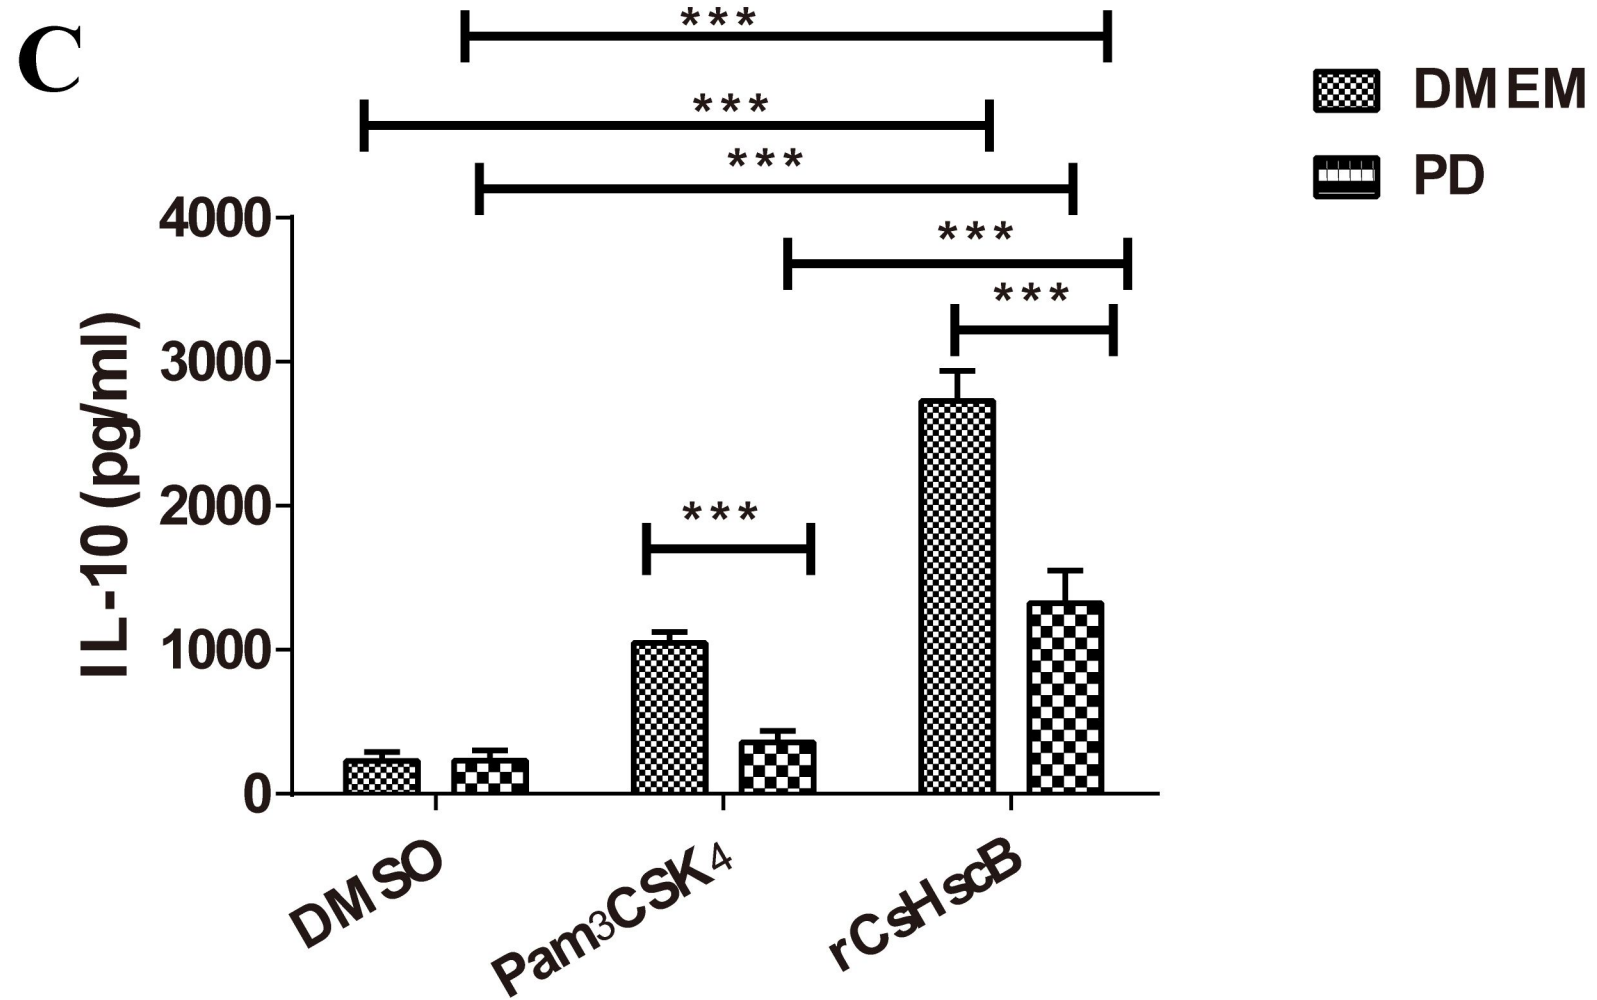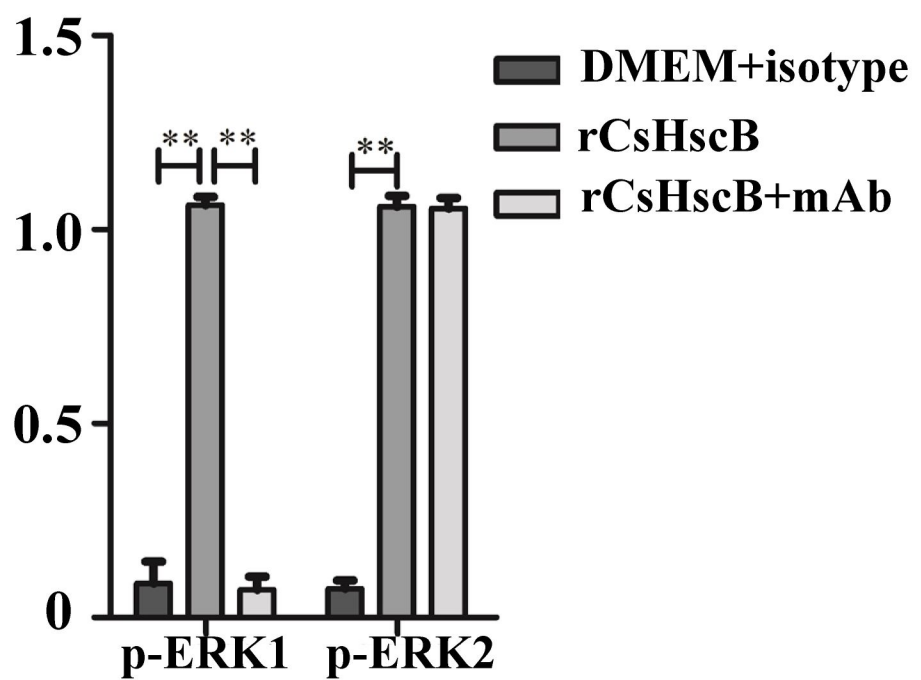

**A**

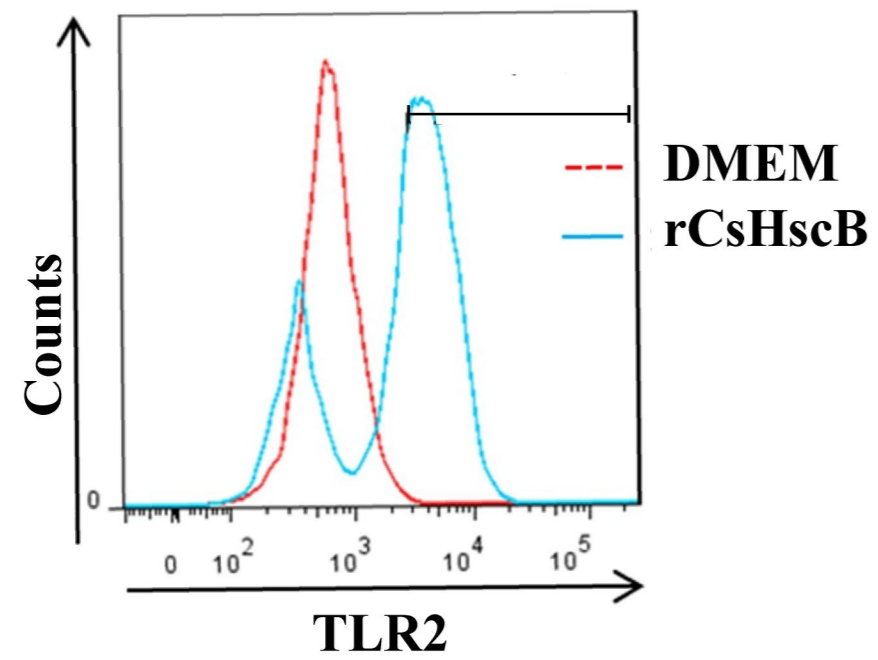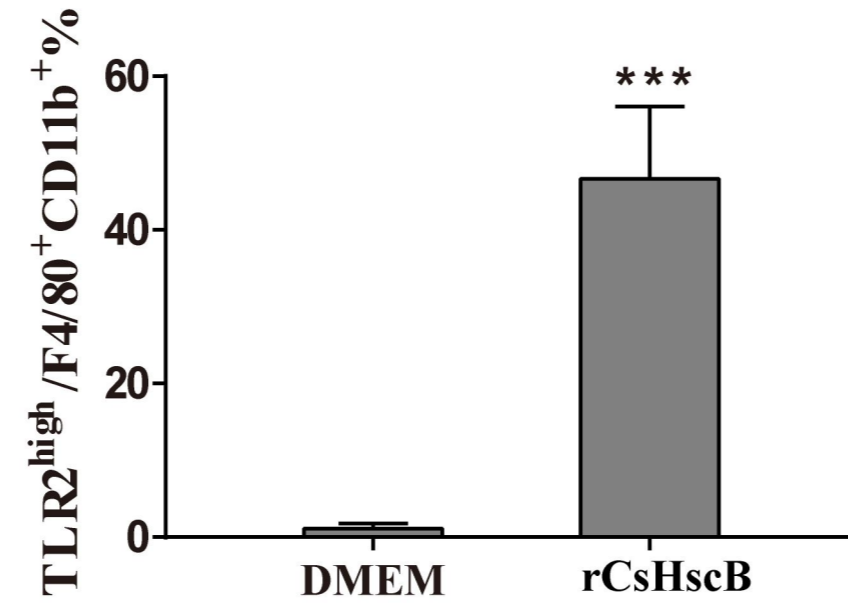

**B**

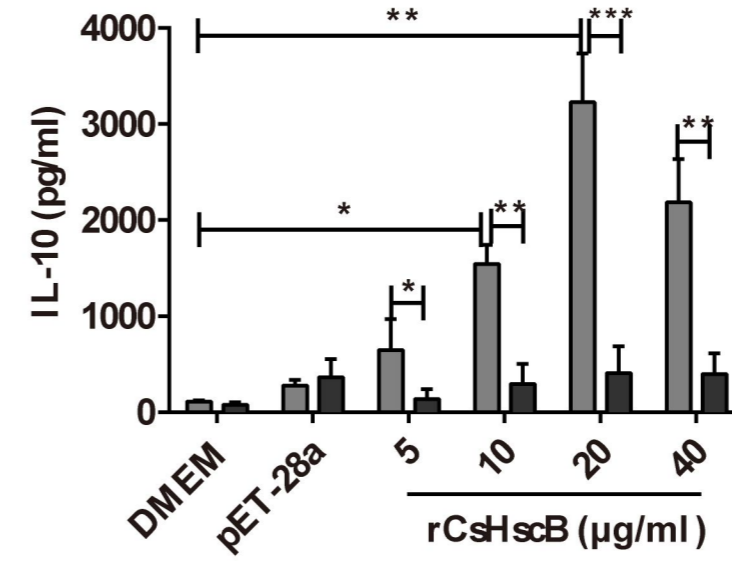

**C**

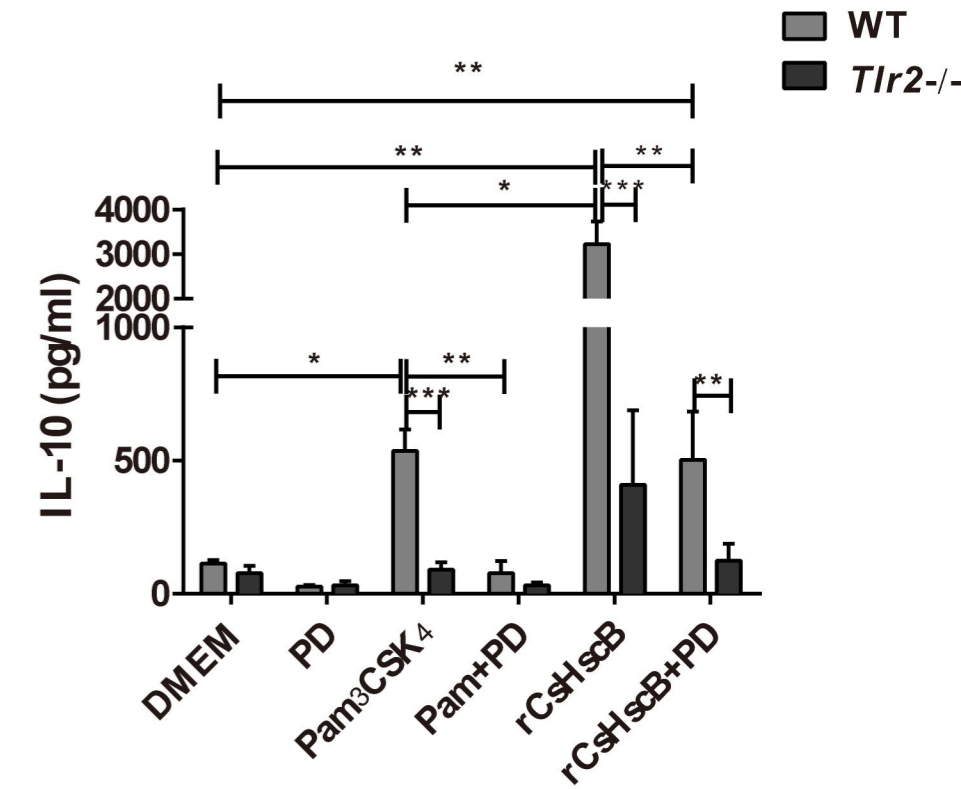

**D**

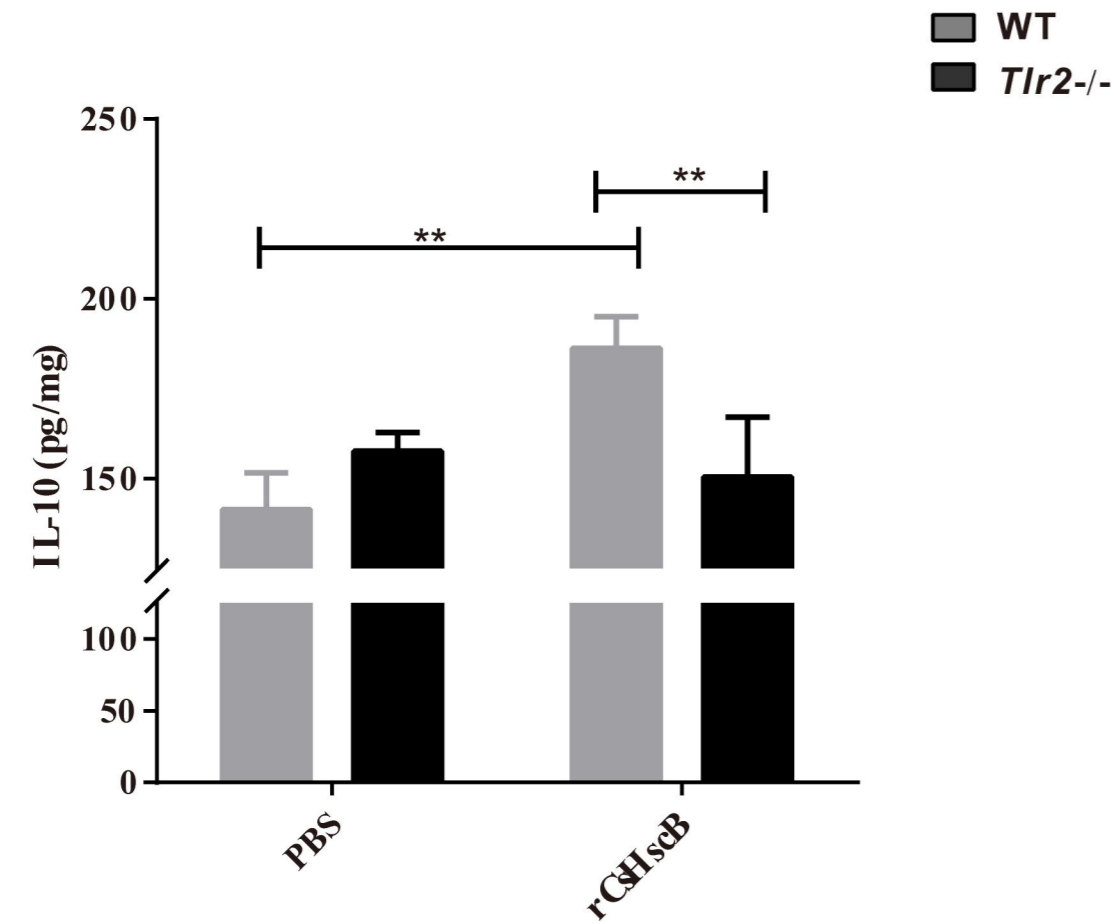

**E**

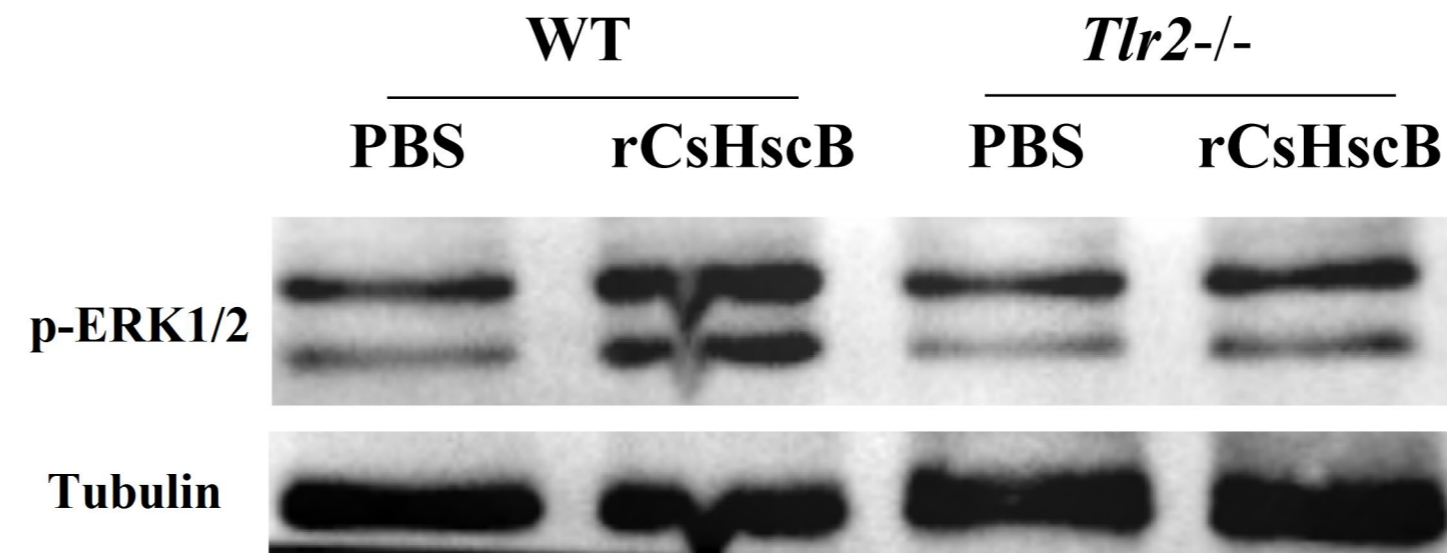

Source: https://www.biorxiv.org/content/10.1101/858670v1.full.pdf
